# 1 **N-glycans mannosylation controls T-cell development by reprogramming** 2 **thymocyte commitment, fate and repertoire.**

3

4 **Authors:** Manuel M Vicente<sup>1,2,3</sup>; Inês Alves<sup>1,4</sup>; Ângela Fernandes<sup>1</sup>; Ana M Dias<sup>1</sup>; Elena Pérez-  
5 Anton<sup>1</sup>; Alexandra Correia<sup>1,2</sup>; Afonso R M Almeida<sup>5</sup>; Gabriel A Rabinovich<sup>6,7,8</sup>; Manuel  
6 Vilanova<sup>1,2</sup>; Ana E Sousa<sup>5</sup>; Salomé S Pinho<sup>1,2,4,9\*</sup>

## 7 **Affiliations:**

8 <sup>1</sup>i3S – Institute for Research and Innovation in Health, University of Porto, 4200-135 Porto,  
9 Portugal.

10 <sup>2</sup>Institute of Biomedical Sciences Abel Salazar (ICBAS), University of Porto, 4050-313 Porto,  
11 Portugal.

12 <sup>3</sup>Graduate Program in Areas of Basic and Applied Biology (GABBA), ICBAS, University of  
13 Porto, 4050-313 Porto, Portugal

14 <sup>4</sup>Faculty of Medicine, University of Porto, 4200-319 Porto, Portugal.

15 <sup>5</sup>Instituto de Medicina Molecular João Lobo Antunes, Faculdade de Medicina, Universidade de  
16 Lisboa, 1649-028 Lisboa, Portugal

17 <sup>6</sup>Laboratorio de Inmunopatología, Instituto de Biología y Medicina Experimental (IBYME),  
18 Consejo Nacional de Investigaciones Científicas y Técnicas (CONICET), 1428 Ciudad de Buenos  
19 Aires, Argentina

20 <sup>7</sup>Laboratorio de Inmuno-oncología Translacional, Instituto de Biología y Medicina Experimental  
21 (IBYME), Consejo Nacional de Investigaciones Científicas y Técnicas (CONICET), 1428 Ciudad  
22 de Buenos Aires, Argentina

23 <sup>8</sup>Facultad de Ciencias Exactas y Naturales (FCEyN), Universidad de Buenos Aires, 1428 Ciudad  
24 de Buenos Aires, Argentina

25 <sup>9</sup>Lead Contact

26 \*Corresponding author: [salomep@ipatimup.pt](mailto:salomep@ipatimup.pt) (S.S.P)

27

## 28 **Abstract:**

29 T-cell development is a major physiological process occurring in complex organisms, that ensures  
30 the formation of T-cell receptors diverse repertoire, to recognize antigens throughout the life of  
31 the organism. The thymus offers a microenvironment for efficient development, where progenitor  
32 populations go through maturation steps, which, when not regulated, are associated with disease  
33 onset, including autoimmune disorders and cancer. Glycosylation is a major post-translational

1 modification that occurs in virtually all cells, including T lymphocytes, regulating receptor-  
2 turnover, affinity and signaling. However, there is a missing knowledge on how glycans regulate  
3 lymphocyte development and their impact in T-cell functions. We discovered stage-specific  
4 glycosylation profiles in human and murine thymocyte populations. Thereafter, we generated two  
5 glycoengineered mouse models displaying *N*-glycosylation pathway deficiencies, at early DN  
6 stages, lacking the *Mgat1* or *Mgat2* genes. We demonstrated remarkable defects in key T-cell  
7 developmental stages, such as  $\beta$ - and DP-selection, natural regulatory T-cell generation,  $\gamma\delta$  T  
8 development/differentiation and thymic egression, in *Mgat1*-deficient thymocytes, indicating a  
9 pathogenic role of mannose *N*-glycans in development. We also demonstrated that a single *N*-  
10 glycan antenna (modelled in *Mgat2*-deficient thymocytes) is sufficient to rescue key  
11 developmental processes. In conclusion, we demonstrated that mannosylated thymocytes render a  
12 dysregulation in T-cell development, associated with disease.

13

14

15

16

17

18

19

20

21

## 1 INTRODUCTION

2 T-cell development is a tightly regulated process that occurs in the thymus, ensuring the  
3 formation of a T-cell pool with a diverse repertoire of T-cell receptors (TCRs), essential in adaptive  
4 immunity[1-3] Thymocytes enter through a series of developmental stages, mainly defined by  
5 variations in coreceptors expression. In the CD4<sup>-</sup>CD8<sup>-</sup> double-negative-3 (DN3) stage, cells  
6 commit to the  $\alpha\beta$  or the  $\gamma\delta$  lineages. Then massive proliferation of DN4 cells leads to the generation  
7 of CD4<sup>+</sup>CD8<sup>+</sup> double-positive (DP) thymocytes, where a successful rearrangement of the *Tcra*  
8 locus generates a mature- and cell-unique TCR. An intermediate population is found on the DN4-  
9 to-DP transition, the CD8<sup>+</sup>CD3<sup>-</sup> (mice) or CD4<sup>+</sup>CD3<sup>-</sup> (humans) immature-single-positive (ISP)  
10 cells. Development of DP into mature CD4<sup>+</sup> or CD8<sup>+</sup> single-positive (SP) thymocytes is highly  
11 regulated by two selection steps: “positive-” and “negative-selection”, where non- or self-reactive  
12 T-cells are eliminated. Moreover, cells with TCR affinities just below the threshold for negative  
13 selection, develop into natural-regulatory T-cells (nTregs)[4,5].

14 Glycans are present in essentially all cellular surfaces, being an important regulator of the  
15 immune system. In fact, T-cells contain a dense coat of glycans (glycocalyx) that tightly regulate  
16 cell activity and function[6-8]. Glycosylation is the enzymatic process responsible for the  
17 attachment of glycans to proteins/lipids by a portfolio of glycosyltransferases and glycosidases,  
18 acting in a step-wise manner[9]. Protein glycosylation has been shown to be essential in the  
19 regulation of T-cell maturation, activation and differentiation[10,11]. However, its impact in T-  
20 cell development and in disease susceptibility remains poorly understood. Previous evidences have  
21 demonstrated essential contributions of  $\alpha$ 2,3-linked sialic-acid to T-cell development[12].  
22 Furthermore, *N*-glycan branching was also shown to regulate DP selection[13]. In fact, complex-  
23 branched *N*-glycans have been described to be chief regulators of T-cell functions[6,10].

1 Specifically, we and other have shown that the deficiency of  $\beta$ 1,6-GlcNAc-branched complex *N*-  
2 glycans promote TCR clustering and signaling, resulting in lower activation thresholds, associated  
3 with increased susceptibility to multiple sclerosis and inflammatory bowel disease (IBD)[7,14-  
4 16].

5 Overall, these evidences support the importance of *N*-glycans as key regulators of  
6 peripheral T-cell activity and function, but the knowledge of their role in central tolerance and T-  
7 cell development is still unclear. Particularly, the glycome profiles of thymocytes along  
8 development and the impact of glycosylation changes in disease susceptibility remain largely  
9 unexplored. Here, we showed that both human and murine thymocyte populations display unique  
10 and distinct glycosylation signatures that define developmental stages. We further demonstrated  
11 that the premature truncation of the *N*-glycosylation pathway, early in murine T-cell development,  
12 globally impairs their development, resembling a primary immunodeficient-like syndrome, with  
13 lower number of peripheral T-cells and increased susceptibility to infection/acute inflammation.  
14 In addition, we found that a single *N*-glycan antenna is the *sine-qua-non* condition needed to rescue  
15 homeostasis and T-cell developmental dynamics and peripheral phenotypes, due to a glycosylation  
16 pathway compensatory effect.

17

## 18 **RESULTS**

### 19 **The glyocalyx landscape in human and murine T-cell development is dynamic and diverse**

20 The complete glyocalyx composition and function of human and murine thymocytes is  
21 far from being completely deciphered. To gain insights into the composition and function of glycan  
22 structures at each T-cell developmental stage, an extensive lectin-based characterization of the

1 human and mice thymic T-cell glycome was performed. A combination of different lectins  
2 recognizing specific *N*-glycan structures were used to assess the levels of relevant glycans along  
3 the *N*-glycosylation pathway (Fig. 1A). Thawed human thymocytes were used to perform the  
4 glycoprofiling of the main developmental T-cell populations (Fig. 1B, Supp. Fig. 1A). We found  
5 that human thymocyte populations display a unique and stage-selective glycocalyx composition  
6 that characterizes and distinguishes each developmental stage (Fig. 1C). Specifically, the complex  
7 branched *N*-glycans detected by L-PHA staining and the terminally  $\alpha$ 2,6 sialylated glycans  
8 detected by the SNA lectin, structures known to be involved in T-cell biology[7], displayed a clear  
9 distinctive profile along T-cell development (Fig. 1D-E). We observed a differential profile of  
10 complex branched *N*-glycans, containing a  $\beta$ 1,6-GlcNAc antenna (L-PHA binding), across human  
11 thymocyte populations (Fig. 1D), showing high representation of these *N*-glycans in DN cells,  
12 which decrease in ISP4, and finally increase in mature populations (Fig. 1F, top). Notably, between  
13 the DP pre-positive selection stage and both DP post-positive selection stage and mature SP cells,  
14 we found a significant increase in L-PHA reactivity (Fig. 1F, top), which reveals differential  
15 expression dynamics of complex branched *N*-glycans on thymocytes, when compared to peripheral  
16 cells[7]. By analyzing SNA reactivity we found an enrichment in  $\alpha$ 2,6-linked sialic acid in the  
17 mature SP populations (Fig. 1E), when compared to ISP4 and DP subsets (Fig. 1F, bottom). As  
18 shown by GNA binding, the proportion of less complex, high mannose *N*-glycans structures was  
19 low among all human thymocyte subsets, being more represented in mature SP populations (Supp.  
20 Fig. 1B, 1D top). The presence of elongated glycans (LEL binding) was higher in DN and ISP4  
21 populations, reaching a peak in the latter (Supp. Fig. 1C, 1D bottom). These results show that  
22 human thymocytes display a unique and dynamic glycan signature that varies considerably during  
23 development.

1           Then, and to evaluate whether the glycan profile of murine thymocytes recapitulates the  
2 one displayed in humans, we glycophenotyped biologically equivalent murine thymocyte  
3 populations (Supp. Fig. 1E). In the mouse, the presence of complex branched *N*-glycans (L-PHA  
4 binding) was enriched in DN and DP cells, increasing in the ISP8 population (equivalent to the  
5 human ISP4). However, in mature SP populations, complex branched *N*-glycans decreased with  
6 developmental progression (Fig. 1G and 1I top). On the other hand, terminal  $\alpha$ 2,6-sialylation was  
7 found to be scarce in DN and ISP8 populations, reaching high levels in mature SP populations  
8 (Fig. 1H and 1I bottom). Moreover, high mannose *N*-glycans remained at low levels across all T-  
9 cell developmental stages (Supp. Fig. 1F and 1H top). Elongated glycans were found to have a  
10 developmental peak in ISP8 cells (Supp. Fig. 1G and 1H bottom). Interestingly, both human and  
11 mouse thymocytes shared major glycoalkyx alterations displaying high levels of mature complex  
12 branched and elongated *N*-glycans in the ISP population that precedes the DP stage, and increased  
13 terminal  $\alpha$ 2,6-sialylation in mature subsets. Interestingly, the relative presence of complex  
14 branched *N*-glycans in mature SP (increase/maintenance in human and decrease in mouse) may  
15 underlie differences between organisms regarding thymic egress and peripheral naïve T-cell  
16 properties.

17           Taken together, this analysis of human and murine thymocytes suggests the existence of a  
18 developmentally-regulated glycome, which supports the existence of functional effects of glycans  
19 in the regulation of T-cell development.

20

21

22

Figure 1

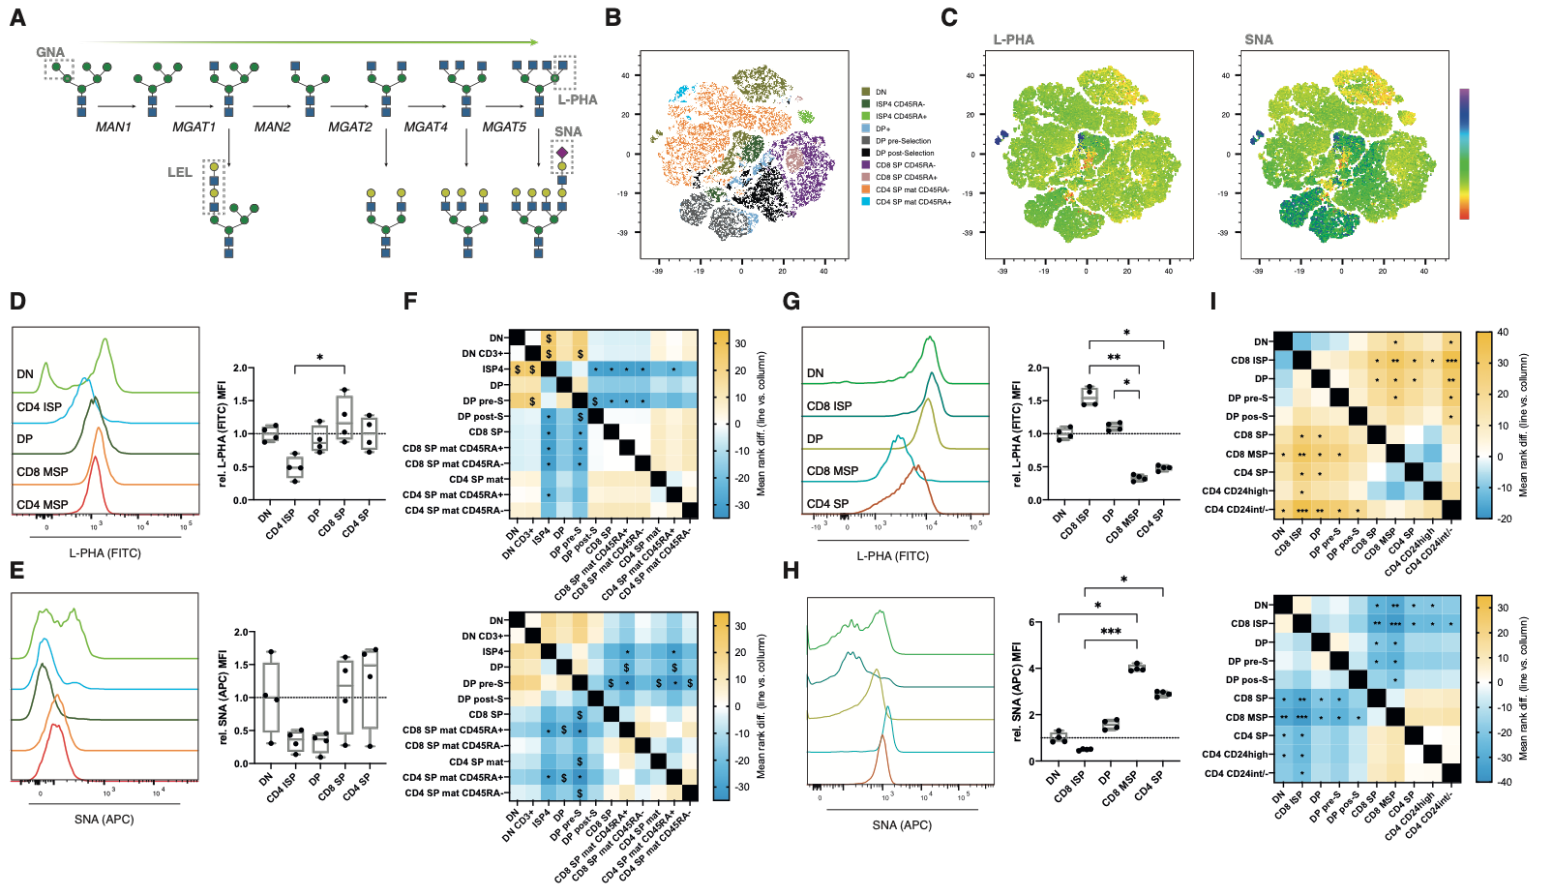

1 **Fig. 1: Human and murine T-cell developmental stages entail differential glycans profiles.**

2 (A) Schematic of the Golgi-located major steps of the *N*-glycosylation pathway, of GlcNAc  
 3 antenna formation, elongation and termination. Boxes indicate the specific lectin binding glycans.

4 (B) Unsupervised flow cytometry analysis of human thymocytes using tSNE, combining the data  
 5 from 4 human thymus, with the main thymocyte populations annotated manually by the gating

6 strategy defined (Supp. Fig. 1A). (C) Colormap for L-PHA (left) and SNA (right) binding levels in  
 7 the same tSNE representation of (B). Colorbar indicates the levels of binding. Histograms of L-

8 PHA and of SNA binding in thymocyte subsets from human (D and E, respectively, N=4) and  
 9 from mouse (G and H, respectively, N=4), with the right graphs depicting the Median

10 Fluorescence Intensity (MFI) quantification and multiple comparisons. Heatmap showing the

1 multiple comparison between populations, done as X (population in line) vs. Y (population in  
2 column). Data are mirrored across the diagonal. Color bar indicates the mean rank difference  
3 values. Kruskal-Wallis test,  $q$ -value  $\leq 0.1$ , \* $< 0.05$ , \*\* $< 0.005$ , \*\*\* $< 0.001$ .

4

## 5 **Lack of GlcNAc-branching *N*-glycans impairs T-cell development, which is rescued by a** 6 **compensatory mono-antennary *N*-glycan structure**

7 The relative abundance of mature complex branched *N*-glycans in DN and ISP  
8 developmental stages (Fig. 1) and their ability to control TCR thresholds[13] prompted us to  
9 investigate their functional relevance in the context of T-cell development. We hypothesized that  
10 complex *N*-glycan structures might have a prominent role during pre-mature TCR selection. To  
11 test this, we have genetically modified the *N*-glycosylation pathway in murine models, at early DN  
12 stages, using a *Rag1*<sup>Cre</sup> strain crossed with *Mgat1*<sup>fl/fl</sup> or *Mgat2*<sup>fl/fl</sup> ones, thus eliminating these two  
13 glycoenzymes as early as in the DN2 developmental stage. The mouse model with the *Rag1*<sup>Cre</sup>-  
14 mediated knockout of *Mgat1* (*Mgat1* cKO) display a complete truncation of complex branched *N*-  
15 glycans, only expressing high-mannose *N*-glycans, whereas the conditional knockout of *Mgat2*  
16 (*Mgat2* cKO) exhibits a partial truncation of complex branched *N*-glycans, generating hybrid-type  
17 *N*-glycan structures with only one GlcNAc antenna which can be further extended. We then set  
18 out to evaluate alterations of the most prevalent thymocyte populations in both glycoengineered  
19 models (Fig. 2A and 2I).

20 Notably, *Mgat1* cKO mice display a significant increase in fraction of DN and DP  
21 thymocytes populations, which is accompanied by a significant decrease in CD8 SP and CD4 SP  
22 populations (Fig. 2B). Within the DN compartment, complete truncation of complex branched *N*-  
23 glycans resulted in a significant drop of DN2 and DN3 thymocytes and an increased frequency of



1 DN4 thymocytes (Fig. 2C), suggesting a significant role of these carbohydrate structures in  $\beta$ -  
2 selection. Moreover, a significant decrease in CD8 mature SP cells, CD4 immature (CD24<sup>hi</sup>, post-  
3 selection and pre-egress) and mature (CD24<sup>lo</sup>) SP cells was observed (Fig. 2D), which may reflect  
4 increased DP negative selection. However, no differences were observed in the frequency of ISP8  
5 thymocytes between *Mgat1* proficient and deficient models (Fig. 2D). The total number of  
6 thymocytes were not different when *Mgat1* pro- and deficient thymi were compared, however with  
7 some significant population specific alterations (Supp. Fig. 2A). Since the absence of complex  
8 branched *N*-glycans may influence expression of cell surface glyco-receptors, we evaluated the  
9 expression levels for the CD4 and CD8 co-receptors, relevant for DP selection/lineage  
10 commitment, and found a significant decrease of both CD4 and CD8 SP co-receptors in the  
11 respective SP populations (Supp. Fig. 2B-C).

12 We then evaluated the impact of *Mgat1* deletion on glycoalyx composition of thymocytes.  
13 As expected, we observed a striking increase in high mannose *N*-glycans (GNA binding) in all  
14 developmental stages beyond DN2 (Fig. 2E, Supp. Fig. 2I top left). Accordingly, interruption of  
15 the *N*-glycosylation pathway led to a complete absence of complex branched *N*-glycans, as shown  
16 by L-PHA staining, in all developmental stages beyond DN2 (Fig. 2F, Supp. Fig. 2I top right).  
17 Elongated glycans (LEL binding) were unaltered in DN cells, suggesting their presence in *O*-  
18 glycans, but were severely decreased in ISP8 and DP thymocyte populations (Fig. 2G, Supp. Fig.  
19 2I bottom left). Loss of complex branched *N*-glycans was also accompanied by ablation of terminal  
20  $\alpha$ 2,6-sialic acid, as determined by SNA probing, in thymocyte's glycoalyces (Fig. 2H, Supp. Fig.  
21 2I bottom right).

22 These results led us to investigate whether the presence of a single GlcNAc-antenna in *N*-  
23 glycans would be sufficient to ensure normal developmental processes. Interestingly, we observed

1 that the frequencies of thymocyte populations in *Mgat2* cKO mice were fully mitigated and  
2 compensated, when compared to their wild-type counterparts (Fig. 2I and 2L). Thus, the presence  
3 of hybrid *N*-glycans, containing the first GlcNAc antenna generated by GnT-I (encoded by *Mgat1*),  
4 was sufficient and a *sine-qua-non* condition to guarantee normal thymic T-cell development.  
5 Notably, the total number of thymocytes of *Mgat2* cKO mice was unaltered, however with some  
6 significant population specific alterations (Supp. Fig. 2E). Moreover, we observed a decreased  
7 expression of the CD4 and CD8 co-receptor surface expression in their respective SP subsets upon  
8 *Mgat2* deficiency (Supp. Fig. 2F-G).

9         The *N*-glycome that enables homeostatic development is characterized by a significant  
10 increase of higher levels of mannose residues (GNA binding), present in hybrid *N*-glycans (Fig.  
11 2M, Supp. Fig. 2J top right) and absence of the  $\beta$ 1,6-GlcNAc antenna (L-PHA binding) in the  
12 developmental stages past DN2 (Fig. 2N, Supp. Fig. 2J top right). Interestingly, we also found a  
13 remarkable increase of elongated poly-LacNAc structures (LEL binding) from the DN3 stage (Fig.  
14 2O, Supp. Fig. 2J bottom left), along with a significant increase of terminal  $\alpha$ 2,6-sialylation that  
15 was evident in mature CD8 and CD4 SP populations (Fig. 2P, Supp. Fig. 2J bottom right). Thus,  
16 an unique GlcNAc-antenna is found to be hyper-elongated, similar to what was described in *Mgat2*  
17 deficient mature T-cells[17], generating a compensatory *N*-glycan structure, that is sufficient to  
18 guarantee normal T-cell development, that is prevented when mature complex branched *N*-glycans  
19 are absent (in a *Mgat1* deficiency scenario). Interestingly, we found that compensatory *N*-glycan  
20 hyper-elongation also restored binding of endogenous galectin-3 (Gal-3) and galectin-1 (Gal-1),  
21  $\beta$ -galactoside-binding lectins, to the surface of DP thymocytes (Supp. Fig. 2H), which were not  
22 observed in *Mgat1*-deficient thymocytes (Supp. Fig. 2D).

1           Collectively these data suggest that the loss of *N*-glycan complexity, in the *Mgat1* cKO  
2 model, has a severe influence on T-cell development, precluding the selection of peripheral T-  
3 cells. This effect could be rescued in the *Mgat2* cKO model, suggesting that one GlcNAc antenna  
4 *N*-glycan is sufficient to compensate the *N*-glycosylation pathway and guarantee normal T-cell  
5 development.

6

7

8

9

10

11

12

13

14

15

16

17

18

19

20

21

22

23

Figure 2

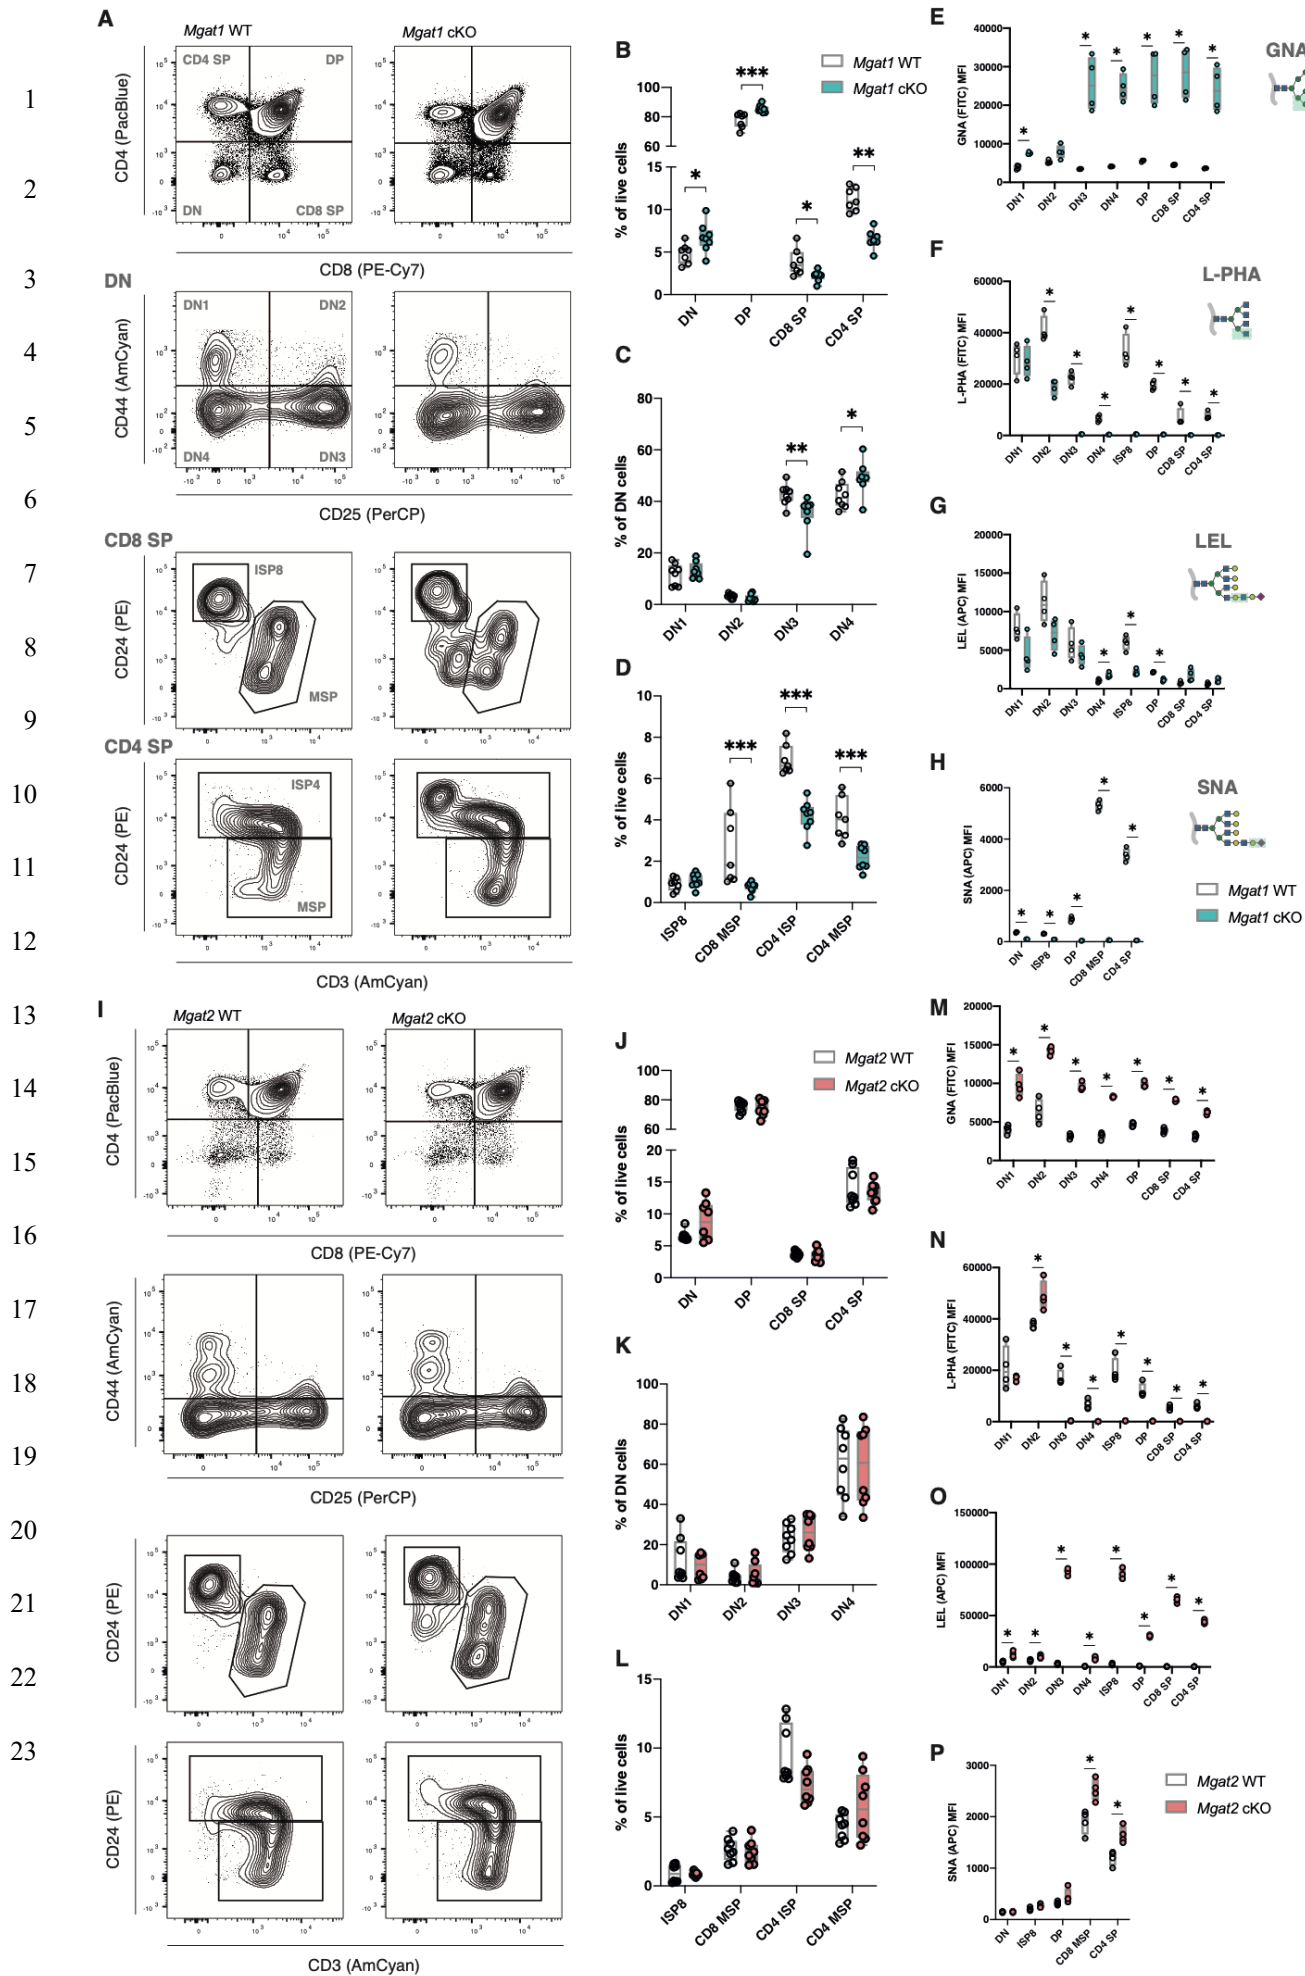

1 **Fig. 2: Impairment of T-cell development in high-mannose restricted thymocytes.** Thymocyte  
2 population discrimination in *Mgat1*WT (N = 4 to 8) and *Mgat1* cKO (N = 4 to 8) and in *Mgat2*WT  
3 (N = 4 to 8) and *Mgat2* cKO (N = 4 to 8) mice (**A** and **I**, respectively). Frequencies of DN (CD4-  
4 CD8-), DP (CD4+CD8+), CD8 SP (CD4-CD8+) and CD4 SP (CD4+CD8-) thymocyte subsets, in  
5 both models (**B** and **J**). Frequencies of DN1 (CD44+CD25-), DN2 (CD44+CD25+), DN3 (CD44-  
6 CD25+) and DN4 (CD44-CD25-) subsets, within the total DN population, in both models (**C** and  
7 **K**). CD8 SP and CD4 SP subset frequencies: ISP8 (CD8+CD24+CD3-), CD8 MSP  
8 (CD8+CD24int/-CD3+), CD4 ISP (CD4+CD24hiCD3lo/hi) and CD4 MSP  
9 (CD4+CD24loCD3hi), in both models (**D** and **L**). (**E** and **M**)GNA, (**F** and **N**) L-PHA, (**G** and **O**)  
10 LEL and (**H** and **P**) SNA binding levels (MFI) in the thymocyte subsets. Each dot represents one  
11 mouse. Mann-Whitney t-test,  $p$ -value \* $< 0.05$ , \*\* $< 0.005$  and \*\*\* $< 0.001$ .

12

### 13 **Efficient $\beta$ -selection requires *N*-glycan branching**

14 Given the alterations in the frequency of DN cells imposed by *Mgat1* deficiency,  
15 particularly the decrease of DN3 and the increase in DN4 subpopulations (Fig. 2), we sought to  
16 investigate the impact of complex branched *N*-glycans in  $\beta$ -selection. This key developmental  
17 checkpoint translates into the functionality of the newly generated  $\beta$ -chain TCRs, a product of *Tcrb*  
18 gene rearrangements[1,2].  $\beta$ -selected DN3 cells begin to express pre-TCR complexes, detected by  
19 the expression of intracellular (ic)TCR $\beta$  chain[18]. To evaluate the role of *N*-glycan branching in  
20  $\beta$ -selection, we first determined the frequency of DN3 cells bearing icTCR $\beta$ . We found in the  
21 *Mgat1* cKO model, a significant decrease of icTCR $\beta$ + DN3 cells but not DN4 cells (Fig. 3A-B),  
22 suggesting that clonal expansion of  $\beta$ -selected thymocytes was not compromised, but rather their  
23 generation. Moreover, in the absence of *Mgat1*, a decrease in CD25 surface expression was

1 detected in total DN3 cells (Fig. 3C), suggesting  $\beta$ -selection defects[19]. Pre-TCR signaling is  
2 responsible for induction of DN3 proliferation and DN4 transition, and can be detected using the  
3 proxy CD5 expression[20]. In the *Mgat1* cKO model, we found a decrease of CD5 expression in  
4 DN3, but not in DN4 cells (Fig. 3D). Thus, disruption of complex branched *N*-glycans interrupts  
5 generation of  $\beta$ -selected thymocytes, but does not alter their clonal expansion. Moreover, as the  
6 disruption of  $\beta$ 1,6-GlcNAc branching *N*-glycans promotes mature TCR receptor clustering and T-  
7 cell hyperactivation[7,15], the clustering of pre-TCR complexes could be playing a role. As IL-7  
8 signaling is one of the key regulators of  $\beta$ -selection[1,2] we evaluated the IL-7R $\alpha$  (CD127)  
9 expression in DN3 cells and found a decrease in *Mgat1* cKO thymocytes (Fig. 3E).

10 In accordance with previous results, the presence of the mono-antennary *N*-glycans on  
11 *Mgat2* cKO mice, was found to be sufficient to compensate and reestablish the  $\beta$ -selection process  
12 (Fig. 3E-J). Thus, complex branched *N*-glycans are essential structures that control  $\beta$ -selection and  
13 pre-TCR signaling.

14

### 15 **Disruption of *N*-glycan branching favors positive selection of $\gamma\delta$ T-cell development**

16 T-cell commitment towards the  $\gamma\delta$  T-cell lineage occurs early at the DN2 and DN3 stages,  
17 where the *Tcr $\gamma$*  and *Tcr $\delta$*  may also be targeted for genetic rearrangements[1,2]. In spite of  
18 considerable progress, the precise mechanisms underlying lineage commitment have not been fully  
19 clarified[21]. Since the absence of *Mgat1* leads to deficient DN3  $\beta$ -selection (Fig. 3A-B), we  
20 analyzed the presence of DN2/3 cells bearing intracellular (ic)TCR $\gamma\delta$ . However, we found no  
21 differences in either *Mgat1*- and *Mgat2*-deficient thymocytes (Fig. 3K). Furthermore, an increase  
22 in the proportion of mature  $\gamma\delta$  T-cells was observed in both glycoengineered models (Fig. 3L and

1 3P). These cells were shown to display absence of complex branched *N*-glycans (L-PHA binding)  
2 and expression of mannosylated *N*-glycans (GNA binding), in both models, as expected (Fig. 3M  
3 and 3Q). When evaluated for TCR-mediated activation, using the CD5 marker, we observed  
4 increased CD5 expression in  $\gamma\delta$  T-cells of *Mgat1* cKO (Fig. 3N), but not in *Mgat2* deficient mice  
5 (Fig. 3R), suggesting higher TCR signaling in *Mgat1* deficient  $\gamma\delta$  T-cells, which has been  
6 associated with the promotion of this T-cell subset development[21]. As IFN-producing  $\gamma\delta$  T-cells  
7 derive from CD27<sup>+</sup> thymic progenitors[22], we evaluated the frequency of CD27<sup>+</sup> $\gamma\delta$  T-cells, but  
8 found no differences in both models (Fig. 3O and 3S).

9 Our results suggest that complex branched *N*-glycans are major determinants for  $\alpha\beta$  and  
10  $\gamma\delta$  T lineage discrimination.

11

12

13

14

15

16

17

18

19

20

21

Figure 3

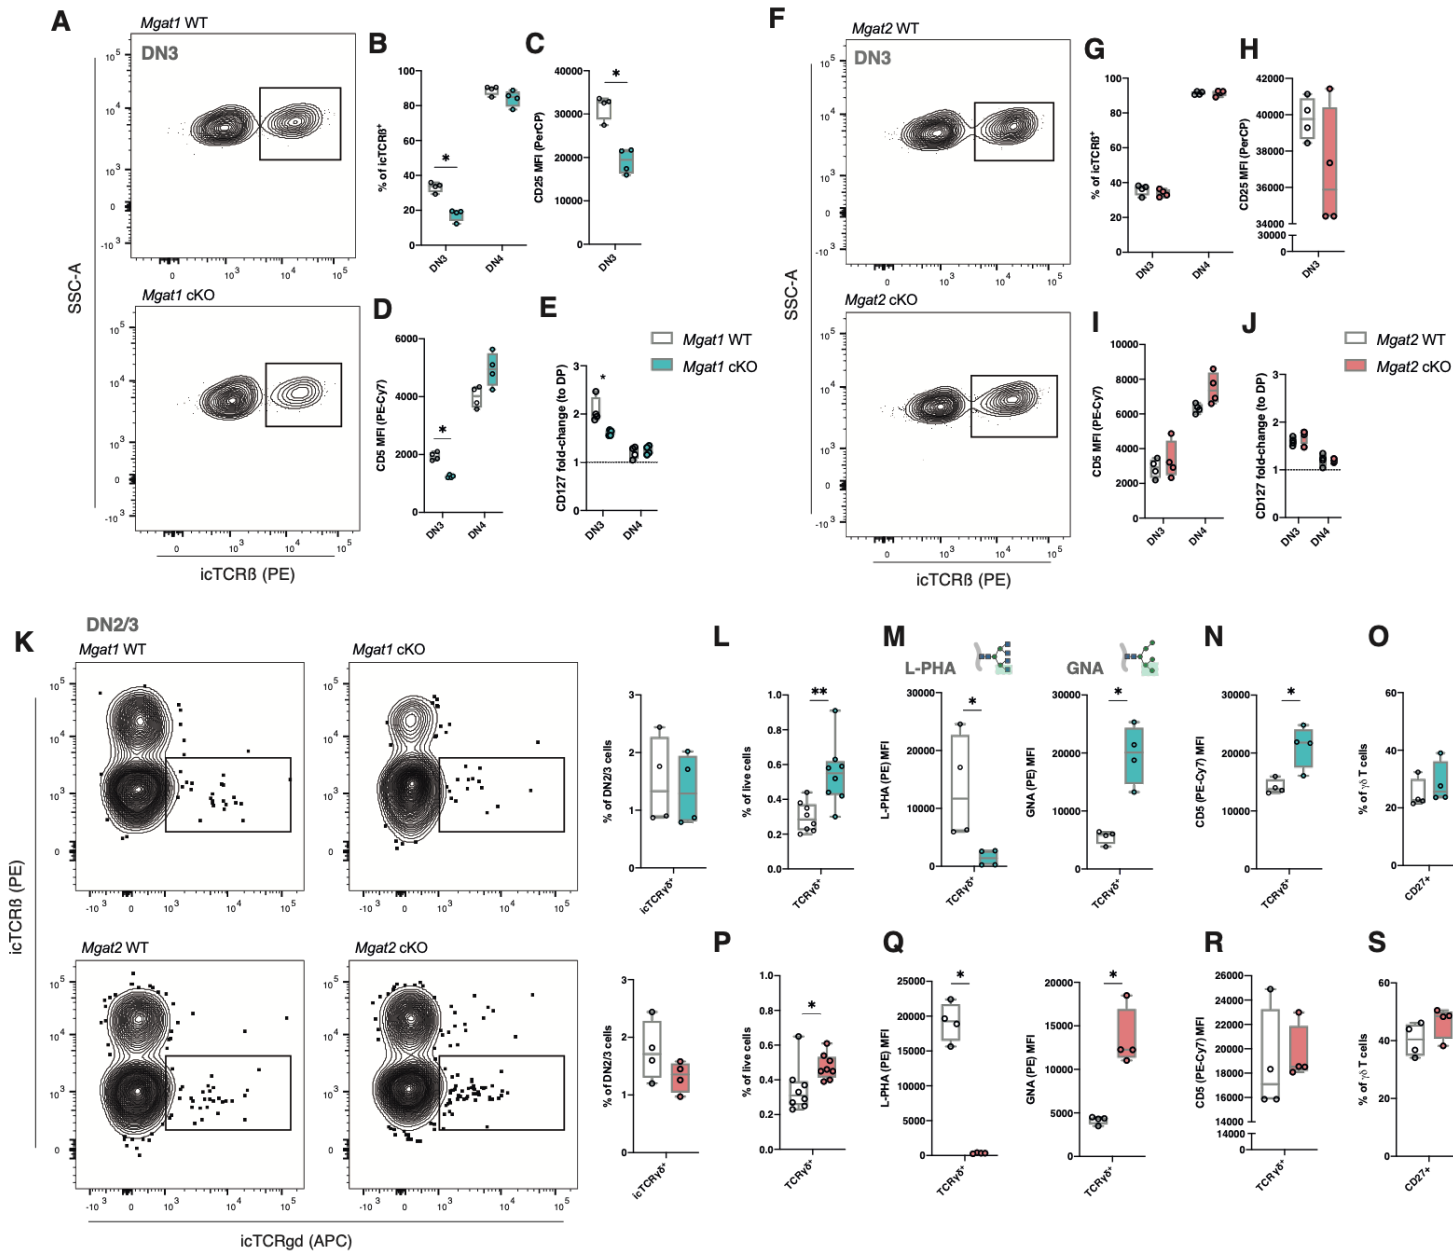

1  
2  
3  
4  
5



1 **Fig. 3: Lack of complex branched N-glycans impairs  $\beta$ -selection and favors determination of**  
2  **$\gamma\delta$  T-cells.** Identification of  $\beta$ -selected (icTCR $\beta$ +) DN3 cells, in *Mgat1*WT (N = 4) and *Mgat1*  
3 cKO (N = 4) and in *Mgat2*WT (N = 4) and *Mgat2* cKO (N = 4) mice (**A** and **F**, respectively).  
4 Frequency of icTCR $\beta$ + cells in DN3 and DN4 thymocytes, in both models (**B** and **G**).  
5 Quantification of CD25 surface levels (MFI) in the DN3 subset, in both models (**C** and **H**).  
6 Quantification of CD5 surface levels (MFI) in DN3 and DN4 thymocytes, in both models (**D** and  
7 **I**). Quantification of CD127 surface levels (MFI), normalized for each mouse to the DP population,  
8 in DN3 and DN4 thymocytes, in both models (**E** and **J**). Identification of icTCR $\gamma\delta$ + cells within  
9 the DN2 and DN3 populations, and frequency quantification, for *Mgat1*WT (N = 4), *Mgat1* cKO  
10 (N = 4), *Mgat2*WT (N = 4) and *Mgat2* cKO (N = 4) mice (**K**). Frequency of total TCR $\gamma\delta$ + cells,  
11 in both models (**L** and **P**). L-PHA (left) and GNA (right) binding levels, in both models (**M** and  
12 **Q**). CD5 surface levels (MFI) of TCR $\gamma\delta$ + cells, in both models (**N** and **R**). CD27 surface levels  
13 (MFI) of TCR $\gamma\delta$ + cells, in both models (**O** and **S**). Each dot represents one mouse. Mann-Whitney  
14 t-test, p-value \* < 0.05, \*\* < 0.005 and \*\*\* < 0.001.

15

## 16 **Complex branched N-glycans are major regulators of TCR repertoire diversity**

17 Previous evidences showed that N-glycans regulate positive and negative DP selection, in  
18 a *Lck*<sup>Cre/+</sup>*Mgat1*<sup>fl/fl</sup> background, where ~70% DP cells were defective in complex-branched N-  
19 glycans.<sup>13</sup> In our *Mgat1*cKO model, in which all DP cells are deficient in complex-branched N-  
20 glycans, the DP selection effect was validated. To investigate the impact of complex N-glycans in  
21 TCR-selection, we analyzed the differential expression of the TCR $\beta$  chain and CD69, to identify  
22 the thymocyte populations undergoing selection<sup>23</sup> (Fig.4A and 4D). Interestingly, *Mgat1*  
23 deficiency caused a significant frequency increase of TCR $\beta$ <sup>-</sup>CD69<sup>-</sup> cells (Fig.4B), that had higher

1 levels of apoptosis, seen by annexin V staining (Fig.4C), indicating increased death by neglect.  
2 Accordingly, a decrease in positively selected cells, TCR $\beta^{\text{hi}}$ CD69 $^{\text{hi}}$ , was observed (Fig.4B).  
3 Finally, post-selection thymocytes, TCR $\beta^{\text{hi}}$ CD69 $^{-}$  were reduced in *Mgat1cKO* mice (Fig.4B),  
4 suggesting more pronounced negative selection. Again, these differences were compensated in the  
5 *Mgat2cKO* mice, as the populations of DP selection as well as apoptosis levels were similar to  
6 their control counterparts (Fig.4D-F).

7 We then analyzed the CD8/CD4 lineage commitment, occurring during TCR-selection, by  
8 analyzing the relative distributions of the three populations described above, according to  
9 CD8/CD4 expression (Fig.4G-H). Interestingly, positively selected cells were differentially  
10 distributed according to their CD8 and CD4 surface expression in both models (Fig.4Gmiddle).  
11 These results indicate a role for *N*-glycans on CD4/CD8 lineage commitment.

12 One of the most important events occurring during TCR-selection is the generation of a  
13 diverse TCR-repertoire.<sup>23</sup> Given the impact of *N*-glycans in TCR-selection, we evaluated whether  
14 selection defects observed in *Mgat1cKO* mice could generate impaired TCR diversity. For this,  
15 we screened for TCR $\beta$  chain expression in the mature SP subsets, using a panel of monoclonal  
16 antibodies. Notably, in *Mgat1cKO* mice we found a significant impact on the diversity of the  
17 TCR $\beta$ -variants-expressing cells in mature SP subsets (Fig.4I). However, no major differences on  
18 TCR-repertoire were observed for *Mgat2cKO* thymocytes(Fig.4J). We cannot exclude that the  
19 defects on  $\beta$ -selection of *Mgat1cKO* mice may contribute to this phenotype and further studies on  
20 TCR-repertoire diversity analysis using next-generation sequencing would provide further  
21 insights.

22 These results indicate the central role of complex-branched *N*-glycan structures in DP  
23 lineage commitment and TCR-repertoire diversity.

1  
2  
3  
4  
5  
6  
7  
8  
9  
10  
11  
12  
13  
14  
15  
16  
17  
18  
19  
20  
21  
22

## Deficiency in complex branched *N*-glycans hampers regulatory T-cell development

The ability of complex branched *N*-glycans to control the thresholds of TCR positive and negative selection raised the question as whether these structures could influence thymic development of T regulatory cells (Tregs). In fact, naturally-occurring Tregs (nTregs) are generated in the thymus, comprising a set of CD4 SP cells with high levels of activation, close to the threshold of negative selection[24]. We have shown that negative selection is promoted in *Mgat1* cKO mice (Fig. 4C) and we argued that Treg generation would be impaired. The initial precursors of Tregs are DP cells which show considerable expression of the FoxP3 transcription factor. Interestingly, this population is decreased in an *Mgat1* deficient scenario (Fig. 4K), whereas no differences were found for *Mgat2* deficiency (Fig. 4M). As mature Tregs may arise from CD4<sup>+</sup>CD25<sup>+</sup>FOXP3<sup>+</sup> and CD4<sup>+</sup>CD25<sup>-</sup>FOXP3<sup>lo</sup> progenitors, we evaluated the presence of these two subsets in the thymic compartment. We detected lower frequency of both populations in *Mgat1* cKO mice (Fig. 4L), and no differences were found in *Mgat2* cKO ones (Fig. 4N). Thus, our results highlight an impact of complex branched *N*-glycans on thymic Treg generation and this effect can be rescued in the presence of hyper-elongated hybrid *N*-glycans.

1  
2  
3  
4  
5  
6  
7  
8  
9  
10  
11  
12  
13  
14  
15  
16  
17  
18  
19  
20

Figure 4

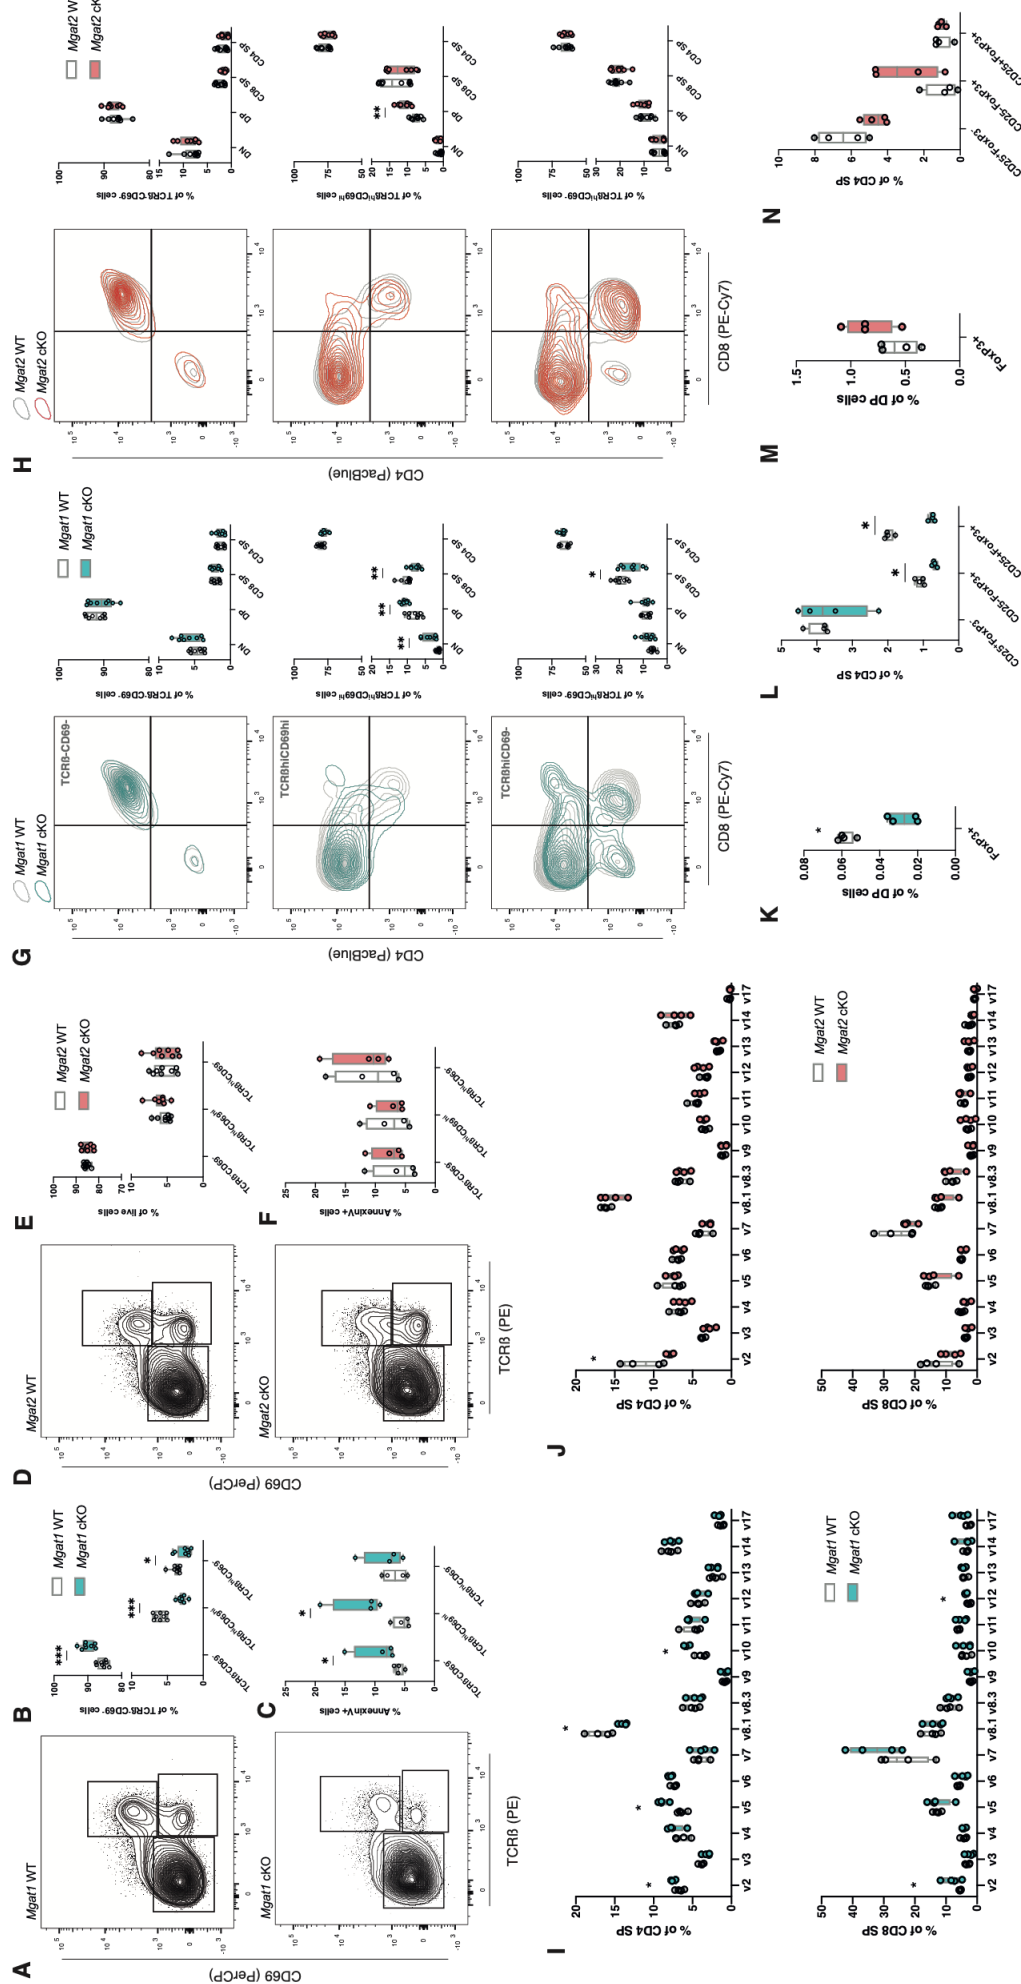

1 **Fig. 4: TCR-selection is impaired in high-mannose restricted *N*-glycome, with severe effects**  
2 **in TCR repertoire diversity and thymic Treg generation. (A) and (D)** Identification of pre-  
3 selection ( $\text{TCR}\beta^{-\text{lo}}\text{CD69}^{-}$ ), post-positive selection ( $\text{TCR}\beta^{\text{int/hi}}\text{CD69}^{\text{int/hi}}$ ) and post-negative  
4 selection ( $\text{TCR}\beta^{\text{hi}}\text{CD69}^{-}$ ) thymocytes in *Mgat1*WT (N = 8) and *Mgat1* cKO (N = 8), and *Mgat2*WT  
5 (N = 8) and *Mgat2* cKO (N = 8) mice, respectively. **(B) and (E)** Quantification of the frequencies  
6 of the populations identified in **(A) and (D)**. **(C) and (F)** Quantification of Annexin V<sup>+</sup> cells within  
7 the thymocyte populations in *Mgat1*WT (N = 4) and *Mgat1* cKO (N = 4), and *Mgat2*WT (N = 4)  
8 and *Mgat2* cKO (N = 4) mice, respectively. **(G) and (H)** Distribution of each selection subset  
9 according to its CD4 and CD8 expression levels, and quantification in *Mgat1*WT and cKO, and  
10 *Mgat2*WT and cKO mice, respectively. **(I) and (J)** Screen of TCRv $\beta$ <sup>+</sup> expressing cells, within  
11 mature CD4 SP (top) and CD8 SP (bottom) in both models. **(K) and (M)** Quantification of the  
12 frequency of FoxP3<sup>+</sup> cells in the DP population, in *Mgat1*WT and cKO, and *Mgat2*WT and cKO  
13 mice, respectively. **(L) and (N)** Detection of Treg thymic precursors, by the expression of CD25  
14 and FoxP3, and population quantification, in *Mgat1*WT and cKO, and *Mgat2*WT and cKO mice,  
15 respectively. Each dot represents one mouse. Mann-Whitney t-test, p-value \* < 0.05, \*\* < 0.005  
16 and \*\*\* < 0.001.

17

## 18 **Lack of complex branched *N*-glycans impairs thymic egress of mature thymocytes**

19 The final step of T-cell development is thymic egress, where thymocytes that surmounted  
20 negative selection upregulate CD62L expression and leave the thymus[25]. The presence of mature  
21 and selected CD4 and CD8 SP thymocytes in both murine models was assessed and the relative  
22 expression of CD3 and CD69 was used to detect post-selection cells (Fig. 5A-B). A remarkable  
23 decrease in the frequency of CD62L<sup>+</sup> cells was observed in post-selection CD4 SP in the *Mgat1*

1 cKO mice, that was fully compensated in *Mgat2* cKO ones (Fig. 5A). However, no differences in  
2 the CD8 SP subset (Fig. 5B) were detected, although a trend toward a decrease in CD8 SP subset  
3 could be observed in the absence of branched *N*-glycans. Thus, thymic egress is markedly  
4 compromised when complex *N*-glycans are absent.

5

## 6 **The absence of complex branched *N*-glycans in thymocytes impairs peripheral T-cell** 7 **homeostasis and immune response**

8         Given the number of defects observed in T-cell development upon complex branched *N*-  
9 glycan deficiency, we further explored the biological consequences of these effects within the  
10 peripheral compartment in both models. We have observed a drastic reduction in total splenocyte  
11 numbers in *Mgat1* cKO mice (Fig. 5C), with no impact observed in *Mgat2* cKO ones (Fig. 5D). In  
12 terms of frequencies of immune populations, we observed a close to absent expression of both T  
13 and B cell subsets in the spleens of *Mgat1* cKO mice (Fig. 5E), comparing with *Mgat2* deficient  
14 ones that showed a preserved expression of these immune cell populations in the spleen similar to  
15 controls (Fig. 5F). This immunoprofile of *Mgat1* cKO mice is compatible with a primary  
16 immunodeficient phenotype. We then evaluated the TCR $\nu\beta$  repertoire in splenic T-cells and found  
17 critical differences in *Mgat1* deficient CD4 and CD8 T-cells, with no alterations in the *Mgat2* cKO  
18 model (Supp. Fig. 3A-B). Strikingly, we found a considerable expansion of the  $\gamma\delta$  T-cell  
19 compartment in the spleens of *Mgat1* cKO mice (Fig. 5E), mimicking a genetic model of  $\alpha\beta$ T-cell  
20 depletion. Moreover, and using the activation marker CD25 and the differentiation marker CD27,  
21 we found substantial alterations in homeostatic  $\gamma\delta$  T-cell differentiation. Lack of branched *N*-  
22 glycans increased the activation status of  $\gamma\delta$  T-cells, but impaired their differentiation status as  
23 revealed by a decrease of CD27<sup>+</sup>CD25<sup>+</sup> T-cells (Fig. 5G). Curiously, and despite no significant

1 differences on total  $\gamma\delta$  T frequencies on *Mgat2* cKO mice (Fig. 5F), we did observe alterations in  
2  $\gamma\delta$  T differentiation (Fig. 5H). To our knowledge, this is the first report demonstrating the impact  
3 of branching *N*-glycosylation pathway in peripheral  $\gamma\delta$  T-cell differentiation and activity.

4 We next explored the pathophysiologic consequences in terms of disease susceptibility of  
5 these phenotypic changes. Both *Mgat1* cKO and *Mgat2* cKO mice were challenged with the  
6 obligate intracellular protozoan *N. caninum*, as resistance to this parasite was previously shown to  
7 be highly T-cell-dependent[26]. Our results showed that *Mgat1* cKO mice exhibited an increased  
8 parasite colonization in key organs analyzed, suggesting a tendency for an increased susceptibility  
9 to infection, when compared to their wild-type counterparts (Fig. 5I), that was not observed in  
10 *Mgat2* cKO mice (Supp. Fig. 3C). Since *N. caninum*-related immune responses are highly  
11 dependent on an intact Th1 response[26], we further analyzed the immunophenotype of the  
12 splenocytes of infected mice, and observed an expansion in both CD4<sup>+</sup> and CD8<sup>+</sup> T-cell  
13 frequencies in *Mgat1* cKO mice, when compared to the steady state ones (Fig. 5J), that presented  
14 a higher frequency CD69<sup>+</sup> cells in CD4<sup>+</sup> T-cells, upon infection, which agrees with the role of  
15 complex *N*-glycans in TCR clustering (Supplemental Fig. 3D). Moreover, we detected negligible  
16 levels of naïve T-cells (CD62L<sup>+</sup>CD44<sup>-</sup>) in the spleens of these mice (Fig. 5J). These results support  
17 an increased pro-inflammatory response in *Mgat1* cKO mice that, together with lowered thresholds  
18 for T-cell activation, may explain the increased susceptibility to infection.

19 To gain further insights on the impact of complex branched *N*-glycans in T-cell  
20 development and on susceptibility to inflammation, we induced experimental colitis in both  
21 models, using dextran sulfate sodium (DSS), given our previous findings on the critical role of T-  
22 cell glycosylation in Inflammatory Bowel Disease[7,14]. We found a trend toward increased  
23 susceptibility of *Mgat1* cKO mice to colitis (Fig. 5K, and Supp. Fig. 3E), as compared with *Mgat2*

1 cKO mice and controls (Supp. Fig. 3F). Moreover, in the *Mgat1* cKO spleens we found a  
2 significant representation of effector T-cell subsets (CD62L<sup>-</sup>CD44<sup>+</sup>), within the CD4 and CD8 T-  
3 cell compartments (Fig. 5L). Particularly, in the colon of these mice, we found an increased  
4 proportion of T-cells and a higher immune infiltrate (Fig. 5M-N), in agreement with a pro-  
5 inflammatory response and decreased activation thresholds of T-cells[7]. Interestingly, in the H<sub>2</sub>O  
6 controls, higher immune infiltrates are seen in the *Mgat1* cKO mice (Fig. 5N). Altogether, our  
7 results show that an early thymocyte deficiency of complex branched *N*-glycans, has profound  
8 central and peripheral immune consequences and confers increased susceptibility to infection and  
9 immune-mediated pathology. Hyper-elongation of *N*-glycans with GlcNAc antennae efficiently  
10 rescues this T-cell phenotype and prevents higher susceptibility to disease development.

11  
12  
13  
14  
15  
16  
17  
18  
19  
20  
21  
22  
23



Figure 5

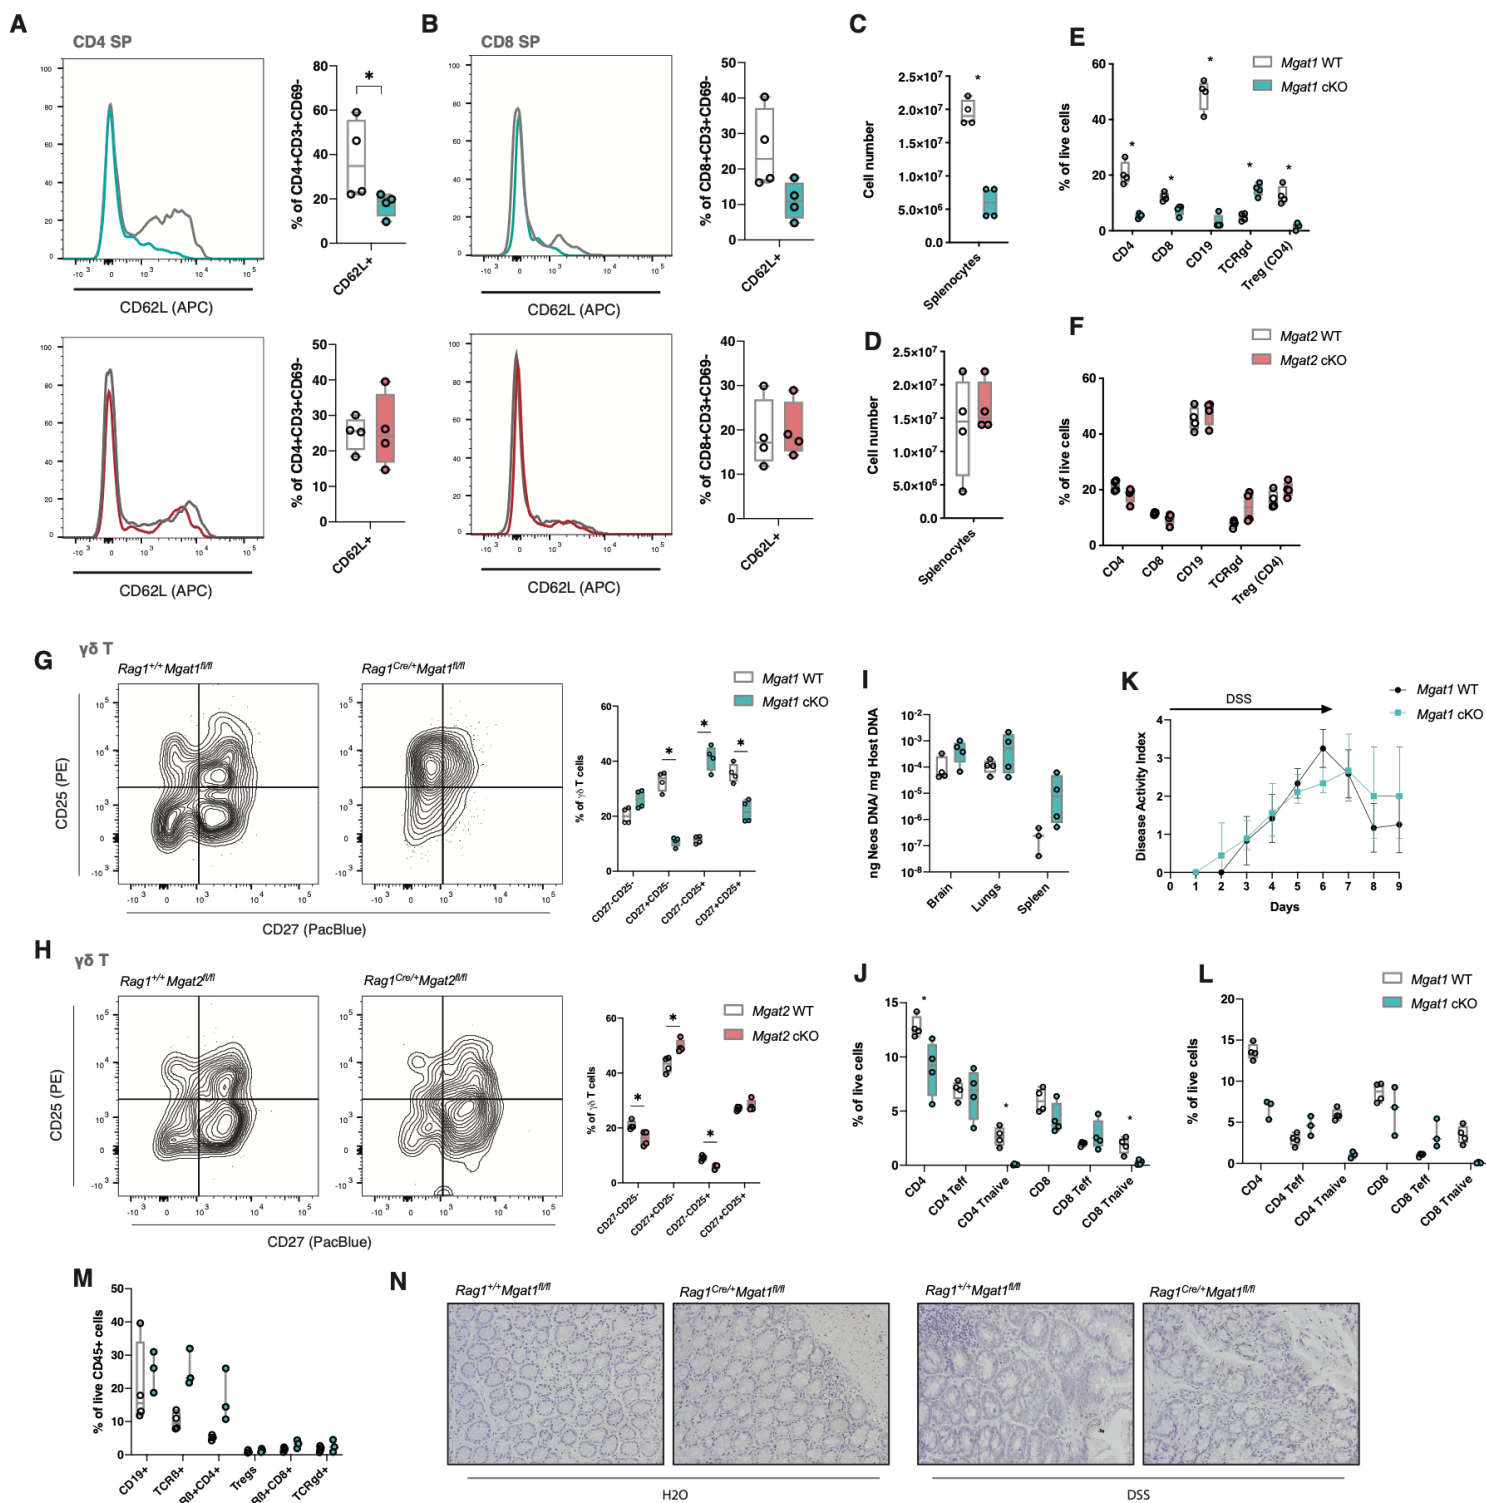

1

2

1 **Fig. 5: Impairments on T-cell development in the absence of *Mgat1* have T-cell egress and**  
2 **peripheral consequences. (A) and (B) Identification of CD62L<sup>+</sup> cells in mature CD4 SP and CD8**  
3 **SP, in *Mgat1*WT (N = 4) and *Mgat1* cKO (N = 4), and *Mgat2*WT (N = 4) and *Mgat2* cKO (N = 4)**  
4 **mice, respectively. (C) and (D) Total splenocyte cell numbers in *Mgat1*WT and cKO, and**  
5 ***Mgat2*WT and cKO mice, respectively. (E) and (F) Quantification of CD4 T, CD8 T, CD19+ (B**  
6 **cells),  $\gamma\delta$  T and Tregs (within CD4 T) immune cell splenic frequencies, in *Mgat1*WT and cKO,**  
7 **and *Mgat2*WT and cKO mice, respectively. (G) and (H) Peripheral  $\gamma\delta$  T-cell activation and**  
8 **differentiation analysis, by the expression of surface CD25 and CD27, and quantification, in**  
9 ***Mgat1*WT and cKO, and *Mgat2*WT and cKO mice, respectively. (I) *N. caninum* organ**  
10 **colonization determination, through the quantification of total parasite DNA in 1 mg of total host**  
11 **DNA, in *Mgat1*WT (N = 3 - 4) and *Mgat1* cKO (N = 4). (J) T-cell frequencies of the spleens of**  
12 **infected mice. (K) Disease Activity Index (DAI) scores for the DSS-induced colitis in *Mgat1*WT**  
13 **(N = 4) and *Mgat1* cKO (N = 3). (L) T-cell frequencies of the spleens and (M) of the colons of the**  
14 **mice. (O) Representative histological analysis of both genotypes, at the final day of the**  
15 **experiment, for both H<sub>2</sub>O and DSS-water fed animals. Each dot represents one mouse. Mann-**  
16 **Whitney t-test, p-value \* < 0.05, \*\* < 0.005 and \*\*\* < 0.001.**

17

## 18 **DISCUSSION**

19 T-cell development is a key biological process that ensures a functional and diverse TCR  
20 repertoire of T-cells, that enables robust mechanisms of immune protection and tolerance. The  
21 discovery of cellular developmental mediators of thymocyte maturation has deserved attention  
22 since the 60's, and have shaped modern immunology[27]. However, in spite of considerable  
23 progress, the function of cell-specific N-glycans in early T-cell commitment, repertoire and

1 selection, and their relevance in T-cell-mediated immunopathology, has been largely unexplored.  
2 Here we present a comprehensive characterization of the glycoalyx composition of both human  
3 and murine thymocytes, demonstrating the existence of an unique glycosylation signature that  
4 distinguishes developmental stages. In both organisms, in homeostatic conditions, thymocytes  
5 display high levels of complex branched *N*-glycans and an upregulation of terminal  $\alpha$ 2,6-  
6 silalation in mature SP populations. In fact, this analysis of the glycome highlighted high *N*-  
7 glycan complexity across different T-cell developmental stages, namely the high levels of poly-  
8 LacNAc structures in immature subsets, elevation of terminal  $\alpha$ 2,6-silalation in mature SP  
9 populations, both accompanied by a considerable presence of complex  $\beta$ 1,6-GlcNAc branching.  
10 Moreover, the overall low levels of high mannose structures, suggests *N*-glycan complexity as a  
11 *sine-qua-non* feature for a proper and functional T-cell development.

12 In order to model the expression of mature complex *N*-glycans in thymocytes, we generated  
13 unique glycoengineered mouse models with conditional ablation of branched *N*-glycans structures  
14 in T-cells, through the *Rag1*<sup>Cre</sup>-mediated disruption of the *Mgat1* and *Mgat2* in DN thymocytes. A  
15 deficiency in the expression of complex branched *N*-glycans, modelled in *Mgat1* cKO mice,  
16 resulted in increased percentages of DN cells relative to total thymocytes that were associated with  
17 an impairment of  $\beta$ -selection. In total DN3 cells, we showed a decreased pre-TCR signaling in the  
18 absence of *Mgat1*, that was restored in DN4, which can be due to pre-TCR clustering, as seen in  
19 mature TCR's, upon the deficiency of complex branched *N*-glycans[13-16]. Moreover, decreased  
20 expression of the IL-7R $\alpha$  may contribute to impaired  $\beta$ -selection, and DN3 survival. The decreased  
21 frequency of  $\beta$ -selected cells appears to be the result of a blockade in  $\alpha\beta/\gamma\delta$  lineage fate  
22 commitment, as demonstrated by an increased  $\gamma\delta$  T-cell population (resembling *Tcrb*<sup>-/-</sup> or *Tcr $\alpha$* <sup>-/-</sup>  
23 mice[30]) upon the deficiency of *Mgat1*, highlighting the relevance of *N*-glycans as master

1 regulators of lineage development and commitment. Moreover, as *N*-glycans control  $\alpha\beta$ TCR  
2 thresholds, the same regulatory effect might be extrapolated to  $\gamma\delta$ TCRs, promoting sustained  
3 signaling to  $\gamma\delta$  T-cells (as shown in the *Mgat1* deficient model), and favoring development of this  
4 T-cell subset[21]. To our knowledge, this is the first report on the role of *N*-glycans in  $\gamma\delta$  T-cell  
5 development, suggesting the critical role of these complex carbohydrate structures in this T-cell  
6 subset.

7         Elegant studies on the contribution of *N*-glycans in TCR selection showed its impact in the  
8 regulation of the thresholds for positive and negative selection[13]. Our work, targeting *Mgat1* at  
9 early stages of T-cell development (*Rag1*<sup>Cre</sup>), has illuminated the contribution of *N*-glycans in  
10 several critical T-cell developmental processes, including lineage commitment, TCR repertoire  
11 determination, thymic Treg generation,  $\gamma\delta$  T-cell development and thymic egress. DP thymocytes  
12 are bi-potential progenitors for the CD4<sup>+</sup> and CD8<sup>+</sup> T-cell lineages, during positive selection[23].  
13 We found that the lack of complex *N*-glycans in cells that have been positively selected was  
14 associated with an increased percentage of cells in the DN and DP quadrants, indicating enhanced  
15 co-receptor internalization, as previously observed in other settings[13], which altered the fate of  
16 DP cells to the CD4 SP and CD8 SP lineages. Importantly, our results further identify an additional  
17 and novel role of *N*-glycans in TCR selection, demonstrating that a deficiency in complex branched  
18 *N*-glycans significantly alters the diversity of the TCRv $\beta$  variants in mature SP cells. Moreover,  
19 we found that thymic Treg generation is also compromised in the absence of complex branched  
20 *N*-glycan structures. Impairment in the generation of nTregs could be associated with reduction of  
21 the TCR affinity threshold for negative selection imposed by the absence of *N*-glycan  
22 branching[13]. Finally, we found a deficiency in CD62L-expressing mature CD4 SP thymocytes  
23 in *Mgat1* cKO's, suggesting an impairment of egression. Altogether, our results demonstrated that

1 thymocyte glycolalyces are developmentally and dynamically regulated, being complex and  
2 elongated branched *N*-glycan structures essential to ensure proper transitions between  
3 developmental stages and for regulating central selection and commitment processes.

4 Interestingly, in this study, we further demonstrated that GlcNAc-branching of *N*-glycans  
5 is a *sine-qua-non* condition for appropriate T-cell development as highlighted by the fact that  
6 *Mgat2* cKO mice, proficient in synthesizing in mono-antennary *N*-glycan structures in T-cells, do  
7 not display major developmental defects, exhibiting a normal  $\beta$ -selection, production of diverse  
8 TCR repertoires, normal generation of Tregs and thymic egress, as well as  $\gamma\delta$  T-cell development.  
9 This suggests that hyper-elongated mono-antennary *N*-glycans are key glycan determinants  
10 essential in T-cell development and able to rescue the majority of developmental processes  
11 markedly impaired in *Mgat1* deficient mice. The synthesis of a mono-antennary *N*-glycan structure  
12 appears to create a compensatory mechanism that allows glycan elongation and terminal  
13 sialylation, essential to feed a proper T-cell selection program. Interestingly, these glycosylation  
14 compensatory pathways have been described in other pathophysiologic settings[17, 33].

15 The phenotypic impact of such a drastic impairment on T-cell development upon absence  
16 of complex branched *N*-glycan structures was demonstrated in *Mgat1* cKO mice. We demonstrated  
17 that a central deficiency of complex branched *N*-glycans on T-cells results in remarkable reduced  
18 lymphocyte populations at the periphery, namely  $\alpha\beta$ T and B cells, resembling primary  
19 immunodeficient disorders. The TCRv $\beta$  reduced variability in thymic SP cells was observed to be  
20 conserved in splenic T-cells, in the *Mgat1* deficient model. This immunodeficient phenotype was  
21 further validated by the increased susceptibility to infection and intestinal inflammation, again  
22 fully compensated by the presence of one GlcNAc-antenna. In addition, we found that  $\gamma\delta$  T-cells  
23 were able to survive and escape to the periphery upon branched *N*-glycans deficiency, pinpointing

1 these cells as key players in the increased susceptibility to infection and inflammation, a concept  
2 that deserves future exploration.

3 Taken together, this study unveils the regulatory power of branched *N*-glycans in T-cell  
4 development, highlighting their role as key determinants for immunity and as essential players in  
5 the control of  $\beta$ -selection, Treg generation, TCR repertoire diversity and  $\gamma\delta$  T-cell development.  
6 Our findings constitute novel features of thymocyte “identity” and function, by revealing branched  
7 *N*-glycans as essential structures of T-cells with implications in determining the susceptibility to  
8 the development of major diseases, such as infection and inflammation.

9

## 10 **MATERIALS AND METHODS**

### 11 **Study design**

12 The goal of this study was to identify differential glycoprofiles of human and murine  
13 thymocytes, and whether the glycoengineering of murine ones would result in alterations in normal  
14 T-cell development and response. We generated murine conditional knockout models for *Mgat1*  
15 and *Mgat2*, with a *Rag1*Cre line. Using lectin- or antibody-based flow cytometry, we detected  
16 cellular subsets’ glycoprofiles and alterations in homeostatic T-cell development, through  
17 phenotyping thymocyte populations. To assess the contribution of the *Mgat1* and *Mgat2*  
18 deficiency in T-cell peripheral responses we used a model of infection and acute inflammation  
19 induction. All experiments/analysis were performed two or more times.

### 20 **Experimental model and subject details**

#### 21 **Animals**

1 Mice were housed at the animal facility of the Institute for Research and Innovation in  
2 Health of the University of Porto (i3S, Porto, Portugal). C57BL/6 wild-type (WT) mice were  
3 acquired from the Jackson laboratory. Mice containing floxed *Mgat1* (MSR Cat# JAX:006891,  
4 RRID:IMSR\_JAX:006891) and *Mgat2* (IMSR Cat# JAX:006892, RRID:IMSR\_JAX:006892)  
5 were kindly provided by Dr. Michael Demetriou (UC Irvine, USA). *Rag1<sup>Cre</sup>* transgenic mice, with  
6 a Cre recombinase gene introduced under the promoter of the *Rag1* gene[34], were kindly provided  
7 by Dr. Marc Veldhoen (Instituto de Medicina Molecular, Portugal). Mice (males) with two floxed  
8 alleles for *Mgat1* or *Mgat2* were crossed with *Rag1<sup>Cre</sup>* ones (females), with only one allele with  
9 the *Cre* gene, to generate *Rag1<sup>Cre</sup>* with heterozygous floxed (both for *Mgat1* and *Mgat2*) progeny.  
10 These mice (females) were then crossed with homozygous floxed *Mgat1* or *Mgat2* ones (males)  
11 to generate *Rag1<sup>Cre</sup>Mgat1<sup>fl/fl</sup>* (*Mgat1* cKO) and *Rag1<sup>Cre</sup>Mgat2<sup>fl/fl</sup>* (*Mgat2* cKO) progeny. The  
12 littermates containing only the two floxed alleles (*Mgat1<sup>WT</sup>* and *Mgat2<sup>WT</sup>*) were used as  
13 controls. All mouse procedures were approved by the i3S ethics committee for animal  
14 experimentation under Portuguese regulation.

15

## 16 **Human thymocyte collection**

### 17 Ethical Statement

18 Thymic specimens (173 to 578 days old) were obtained during routine thymectomy  
19 performed during pediatric corrective cardiac surgery at Hospital de Santa Cruz, Carnaxide,  
20 Portugal, after parent's written informed consent, using thymic tissue that would be otherwise  
21 discarded. The study was approved by the Ethical Boards of Faculty of Medicine of the University  
22 of Lisbon and of Hospital de Santa Cruz, Carnaxide, Portugal.

1

## 2 **Preparation of human thymocyte populations**

3 Total thymocytes were recovered through tissue dispersion and separation on a Ficoll-  
4 Paque PLUS (GE Healthcare) density gradient. Cells were then frozen in drop by drop added  
5 freezing medium (86% FCS, 14% DMSO), placed for 48H at -80° in isopropanol container and  
6 stored in liquid nitrogen until use, and cells were thawed immediately before use.

7

## 8 **Mice organ isolation**

9 After CO<sub>2</sub>-mediated euthanasia, thymi and spleens were collected from age and sex  
10 matched mice and rinsed in PBS 2%FBS. Organs were macerated in a 70 µm nylon mesh, in order  
11 to generate single cell suspensions. For erythrocyte lysis, cells were incubated for 3 minutes at  
12 room temperature with 1x ACK (150 mM NH<sub>4</sub>Cl; 10 mM KHCO<sub>3</sub>; 0.1 mM Na<sub>2</sub>EDTA), and  
13 washed in PBS 2%FBS. Cells were counted and stored in PBS 2%FBS on ice until further  
14 immediate use.

15

## 16 **Flow cytometry**

17 Cell suspensions were stained with lectins and monoclonal antibodies from eBioscience  
18 and Biolegend, as described[7]. Briefly, for viability detection, cells were resuspended in PBS  
19 and incubated with Fixable Viability Dye APC-Cy7 for 30 minutes on ice in the dark. For lectin  
20 staining, performed in murine and human thymocytes, 1x10<sup>6</sup> cells were isolated and incubated  
21 with conjugated lectins for 30 minutes on ice, prior to antibody staining. Conjugated lectins  
22 (Vector labs) used were *Phaseolus Vulgaris* Leucoagglutinin (L-PHA), *Lycopersicon Esculentum*



1 lectin (LEL), *Galanthus Nivalis* lectin (GNA), and *Sambucus Nigra* lectin (SNA). Antibodies were  
2 titrated and optimal concentrations were set, and cells were incubated for 30 minutes on ice in the  
3 dark. For intracellular staining, cells were fixed and permeabilized with the FoxP3 Fix/Perm buffer  
4 set. For TCRv $\beta$  screen, cells were stained for specified markers, washed, and incubated for 30  
5 minutes on ice in the dark with supplied antibodies suspensions. For galectin-1 binding, cells were  
6 stained for specified antibodies and incubated with recombinant galectin-1, as described[10]. Cells  
7 were analyzed in a FACS Canto II (BD Bioscience), and data was analyzed with the FlowJo v10  
8 software.

9

## 10 ***Neospora caninum* infection**

11 *N. caninum* tachyzoites (NcT) (Nc-1, ATCC® 50843) were propagated by serial passages  
12 in VERO cell cultures, maintained in Minimal Essential Medium (MEM) containing Earle's salts  
13 (Sigma, St. Louis, MO, USA), supplemented with 10% fetal calf serum (BioWest, Nuaille,  
14 France), L-Glutamine (2mM), Penicillin (100 IU/ml) and Streptomycin (100  $\mu$ g/ml) (all from  
15 Sigma), in a humidified atmosphere with 5% CO<sub>2</sub> at 37°C. Free parasites were obtained as  
16 previously described[26]. *N. caninum* challenge infections of 8-week old mice were performed by  
17 i.p. inoculation of  $1 \times 10^7$  freshly isolated NcT in 500  $\mu$ L of PBS. Mouse weights and overall  
18 conditions were monitored daily until day 7 post infection. At euthanasia, spleens, lungs, and  
19 brains were collected for DNA isolation and parasite load quantification by qPCR, as  
20 described[26].

21

## 22 **Acute colitis induction**

1 Colitis was induced in *Mgat1*WT, *Mgat1* cKO, *Mgat2*WT and *Mgat2* cKO 8-week old  
2 mice, using 2% DSS in water, for 7 days. Mouse weights, feces consistency, presence of blood in  
3 feces and rectum, and overall conditions were monitored daily. At euthanasia, colons and spleens  
4 were collected, for flow cytometry analysis. Colons were formalin-fixed and paraffin embedded  
5 and used for H&E staining, as described[7].

6

### 7 **Quantification and Statistical analysis**

8 Statistical analyzes were performed using the GraphPad Prism 9 software. Further details  
9 of the statistics can be found in the Fig. legends. Multiple comparisons were done using the  
10 Kruskal-Wallis test. Significance values were computed using Mann-Whitney t-test. No statistical  
11 method was used to predetermine the sample size. All experiments were performed at least 2 times,  
12 with mice from independent progenies.

13

### 14 **Acknowledgments:**

15 We would like to thank Dr. Michael Demetriou and Dr. Marc Veldhoen for providing  
16 *Mgat1*<sup>fl/fl</sup> and *Mgat2*<sup>fl/fl</sup>, and *Rag1*<sup>Cre</sup> mice, respectively. **Funding:** Institutional funding,  
17 Portuguese Foundation for Science and Technology (FCT), projects NORTE-01-0145-FEDER-  
18 000029, POCI-01/ 0145-FEDER-016601, POCI-01-0145-FEDER-028772, PTDC/MEC-  
19 REU/28772/2017 (SSP); Grant from Portuguese group of study in autoimmune diseases (NEDAI)  
20 to SSP. MMV [PD/BD/135452/2017] and IA [SFRH/BD/128874/2017] received funding from the  
21 FCT.

1 MMV and SSP designed research. MMV conducted most of the experiments, figure editing  
2 and data analysis, with technical input from: IA, ÂF and AMD in animal experimentation; EP and  
3 AC in infection experiments. SSP, AC, GAR, MV and AES contributed with reagents/analytical  
4 tools. AC, ARMA, GAR and MV provided intellectual input to research and expertise in data  
5 analysis. MMV and SSP wrote the manuscript with contributions from all authors.

6

## 7 **References**

8 1. Koch U & Radtke F. Mechanisms of T-cell Development and Transformation. *Annual Review*  
9 *of Cell and Developmental Biology*. 2011;27(1):539–562.

10

11 2. Takaba H & Takayanagi H. The Mechanisms of T-cell Selection in the Thymus. *Trends in*  
12 *Immunology*. 2017;38(11):805–816.

13

14 3. Yu Q, Erman B, Park JH, Feigenbaum L, & Singer A. IL-7 Receptor Signals Inhibit  
15 Expression of Transcription Factors TCF-1, LEF-1, and ROR $\gamma$ t. *The Journal of*  
16 *Experimental Medicine*. 2004;200(6):797–803.

17

18 4. Kimura MY, Thomas J, Tai X, Guinter TI, Shinzawa M, Etzensperger R, et al. Timing and  
19 duration of MHC I positive selection signals are adjusted in the thymus to prevent lineage  
20 errors. *Nature Immunology*. 2016;17:1–10.

21

- 1 5. Starr TK, Jameson SC, & Hogquist KA. Positive and Negative Selection of T-cells. *Annual*  
2 *Review of Immunology*. 2003;21(1):139–176.  
3
- 4 6. Pereira MS, Alves I, Vicente M, Campar A, Silva MC, Padrão NA, et al. Glycans as Key  
5 Checkpoints of T-cell Activity and Function. *Frontiers in Immunology*. 2019;9:7842–13.  
6
- 7 7. Dias AM, Correia A, Pereira MS, Almeida CR, Alves I, Pinto V, et al. Metabolic control of T-  
8 cell immune response through glycans in inflammatory bowel disease. *Proc Natl Acad*  
9 *Sci USA*. 2018;115:E4651–60. <http://doi.org/10.1073/pnas.1720409115>  
10
- 11 8. Pinho SS, & Reis CA. Glycosylation in cancer: mechanisms and clinical implications. *Nature*  
12 *Reviews Cancer*. 2015;15(9):540–555.  
13
- 14 9. Varki A, Cummings RD, Esko JD, Stanley P, Hart GW, Aebi M, et al. Essentials of  
15 Glycobiology. 3rd ed. Cold Spring Harbor (NY); 2015.  
16
- 17 10. Toscano MA, Bianco GA, Ilarregui JM, Croci DO, Correale J, Hernandez JD, et al.  
18 Differential glycosylation of TH1, TH2 and TH-17 effector cells selectively regulates  
19 susceptibility to cell death. *Nature Immunology*. 2007;8(8):825–834.  
20

- 1 11. Comelli EM, Sutton-Smith M, Yan Q, Amado M, Panico M, Gilmartin T., et al. Activation  
2 of Murine CD4<sup>+</sup> and CD8<sup>+</sup> T Lymphocytes Leads to Dramatic Remodeling of N-Linked  
3 Glycans. *The Journal of Immunology*. 2006;177, 2431–2440.
- 4
- 5 12. Moody AM, Chui D, Reche PA, Priatel JJ, Marth JD, Reinherz EL. Developmentally  
6 regulated glycosylation of the CD8 $\alpha\beta$  coreceptor stalk modulates ligand binding. *Cell*.  
7 2001;107:501–12.
- 8
- 9 13. Zhou RW, Mkhikian H, Grigorian A, Hong A, Chen D, Arakelyan A, & Demetriou M. N-  
10 glycosylation bidirectionally extends the boundaries of thymocyte positive selection by  
11 decoupling Lck from Ca<sup>2+</sup> signaling. *Nature Immunology*. 2014;15(11):1038–1045.
- 12
- 13 14. Dias AM, Dourado J, Lago P, Cabral J, Marcos-Pinto R, Salgueiro P, et al. Dysregulation of  
14 T-cell receptor N-glycosylation: a molecular mechanism involved in ulcerative colitis.  
15 *Human Molecular Genetics*. 2013;23(9):2416–2427.
- 16

Figure 1

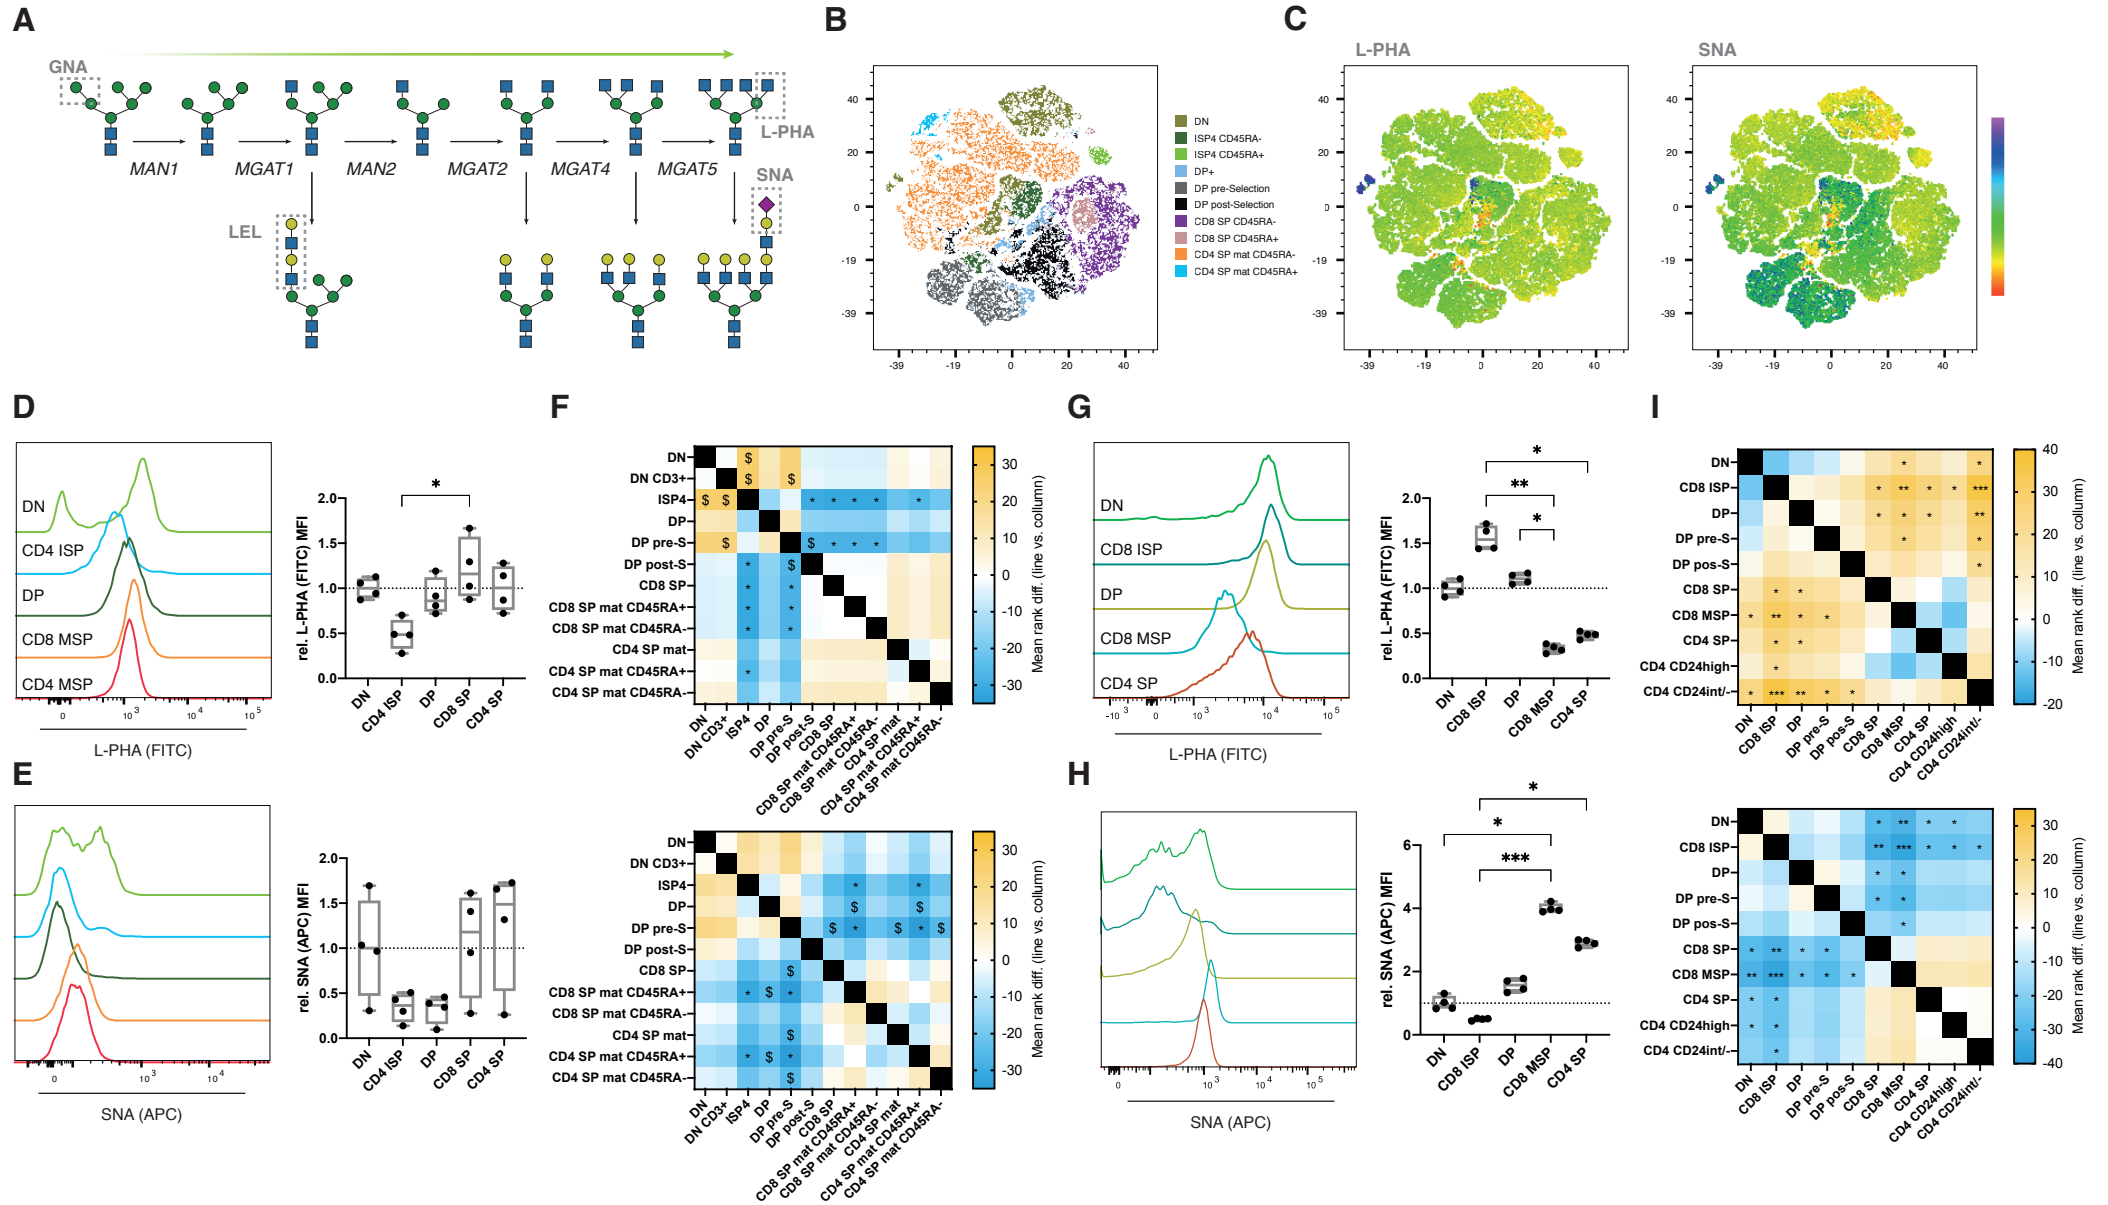

Figure 2

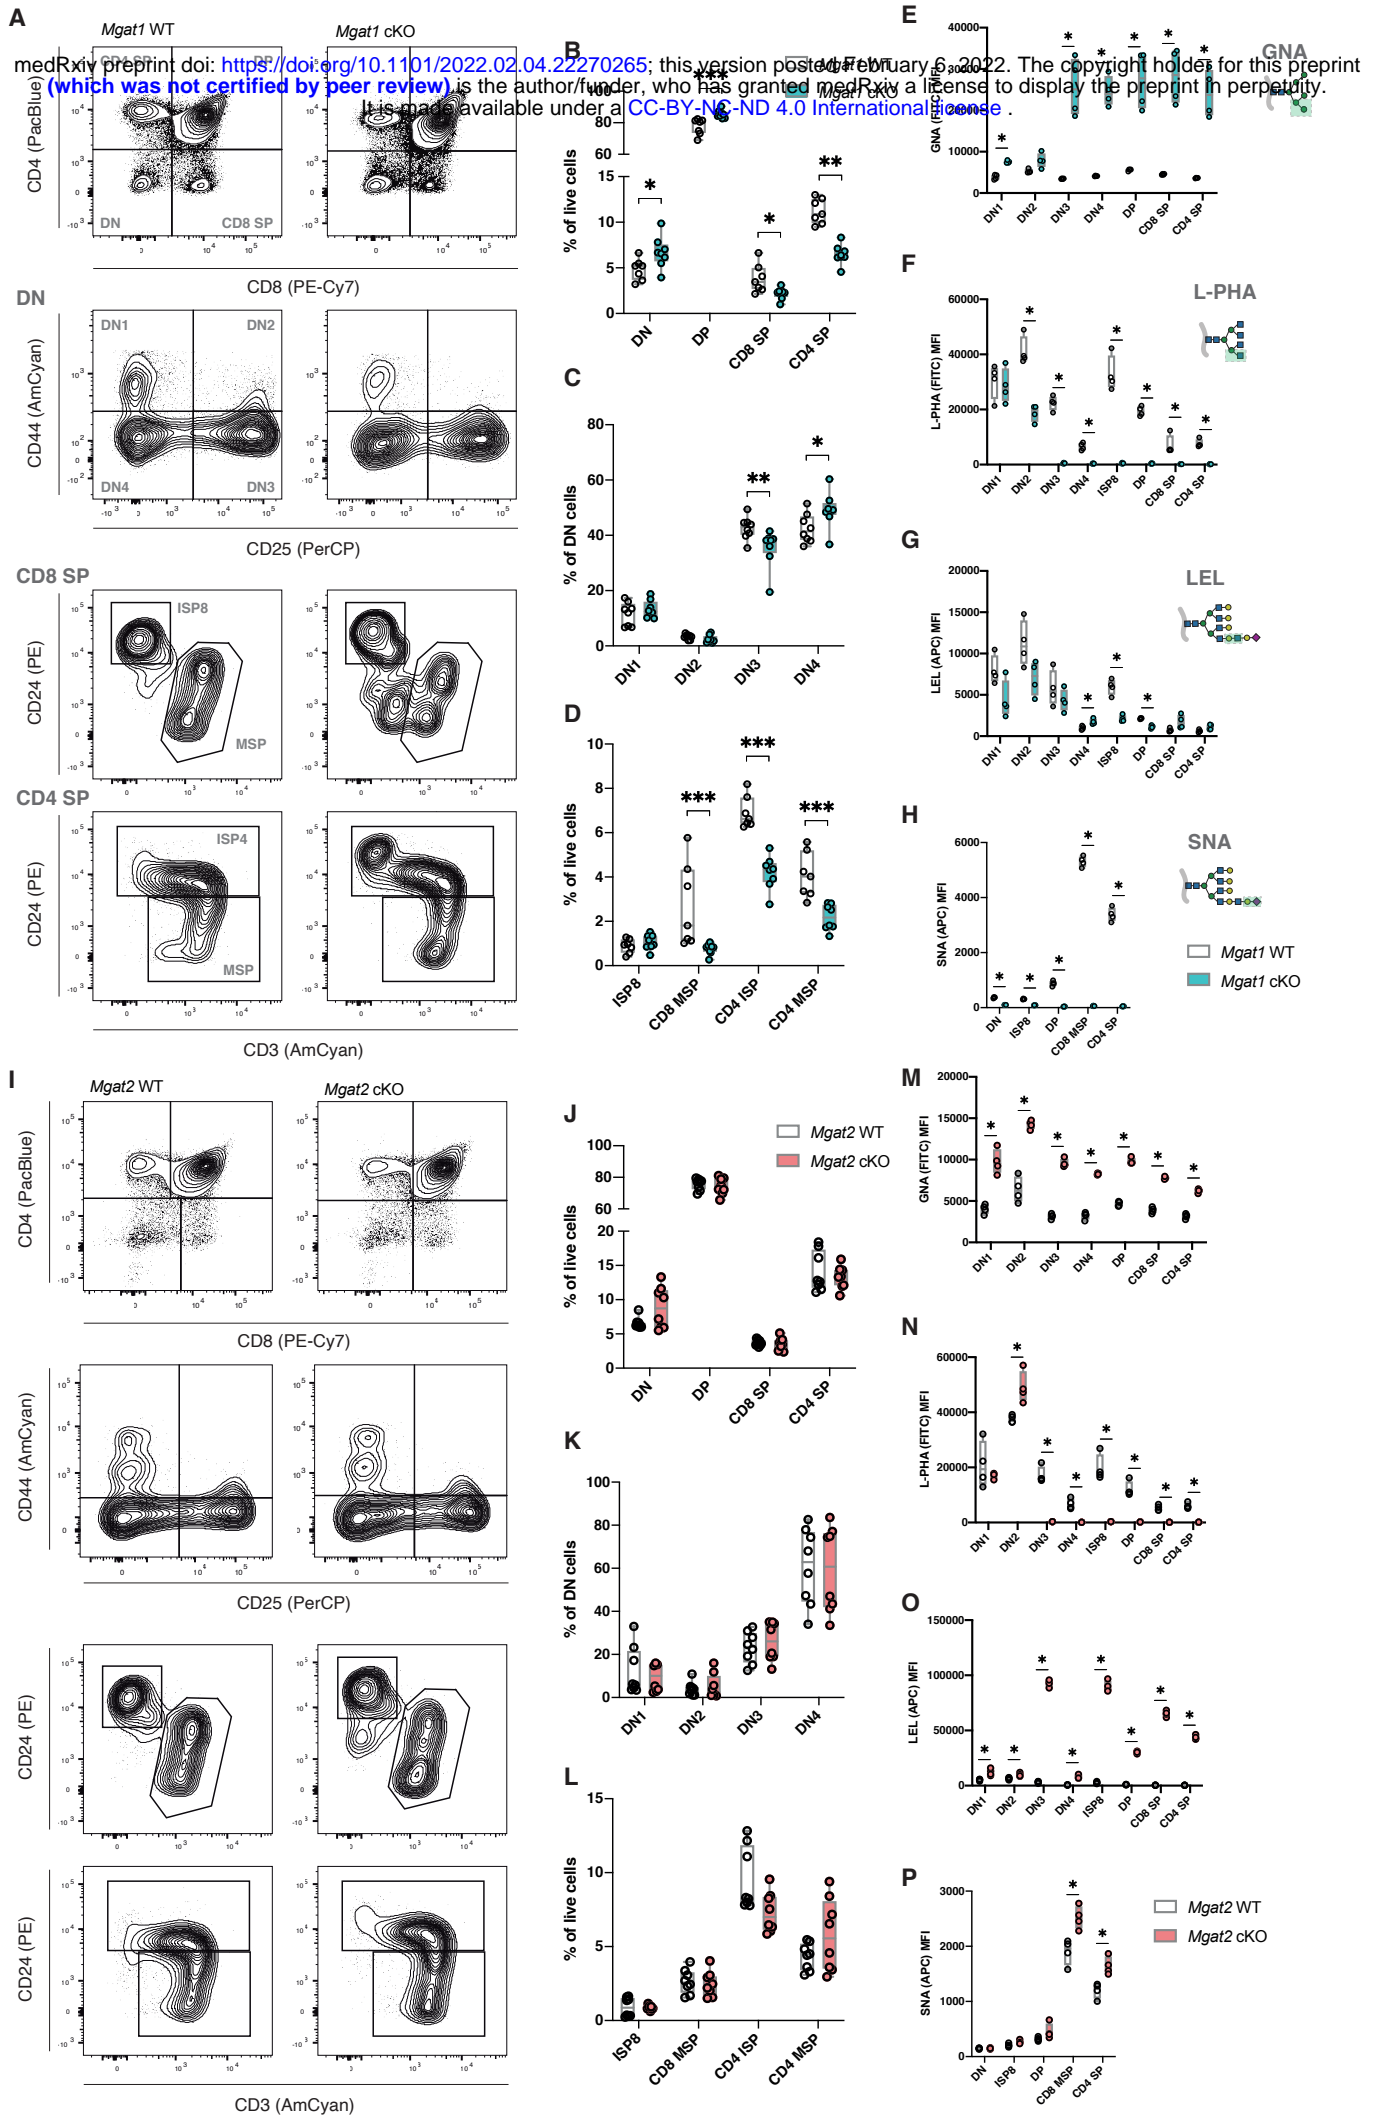

Figure 3

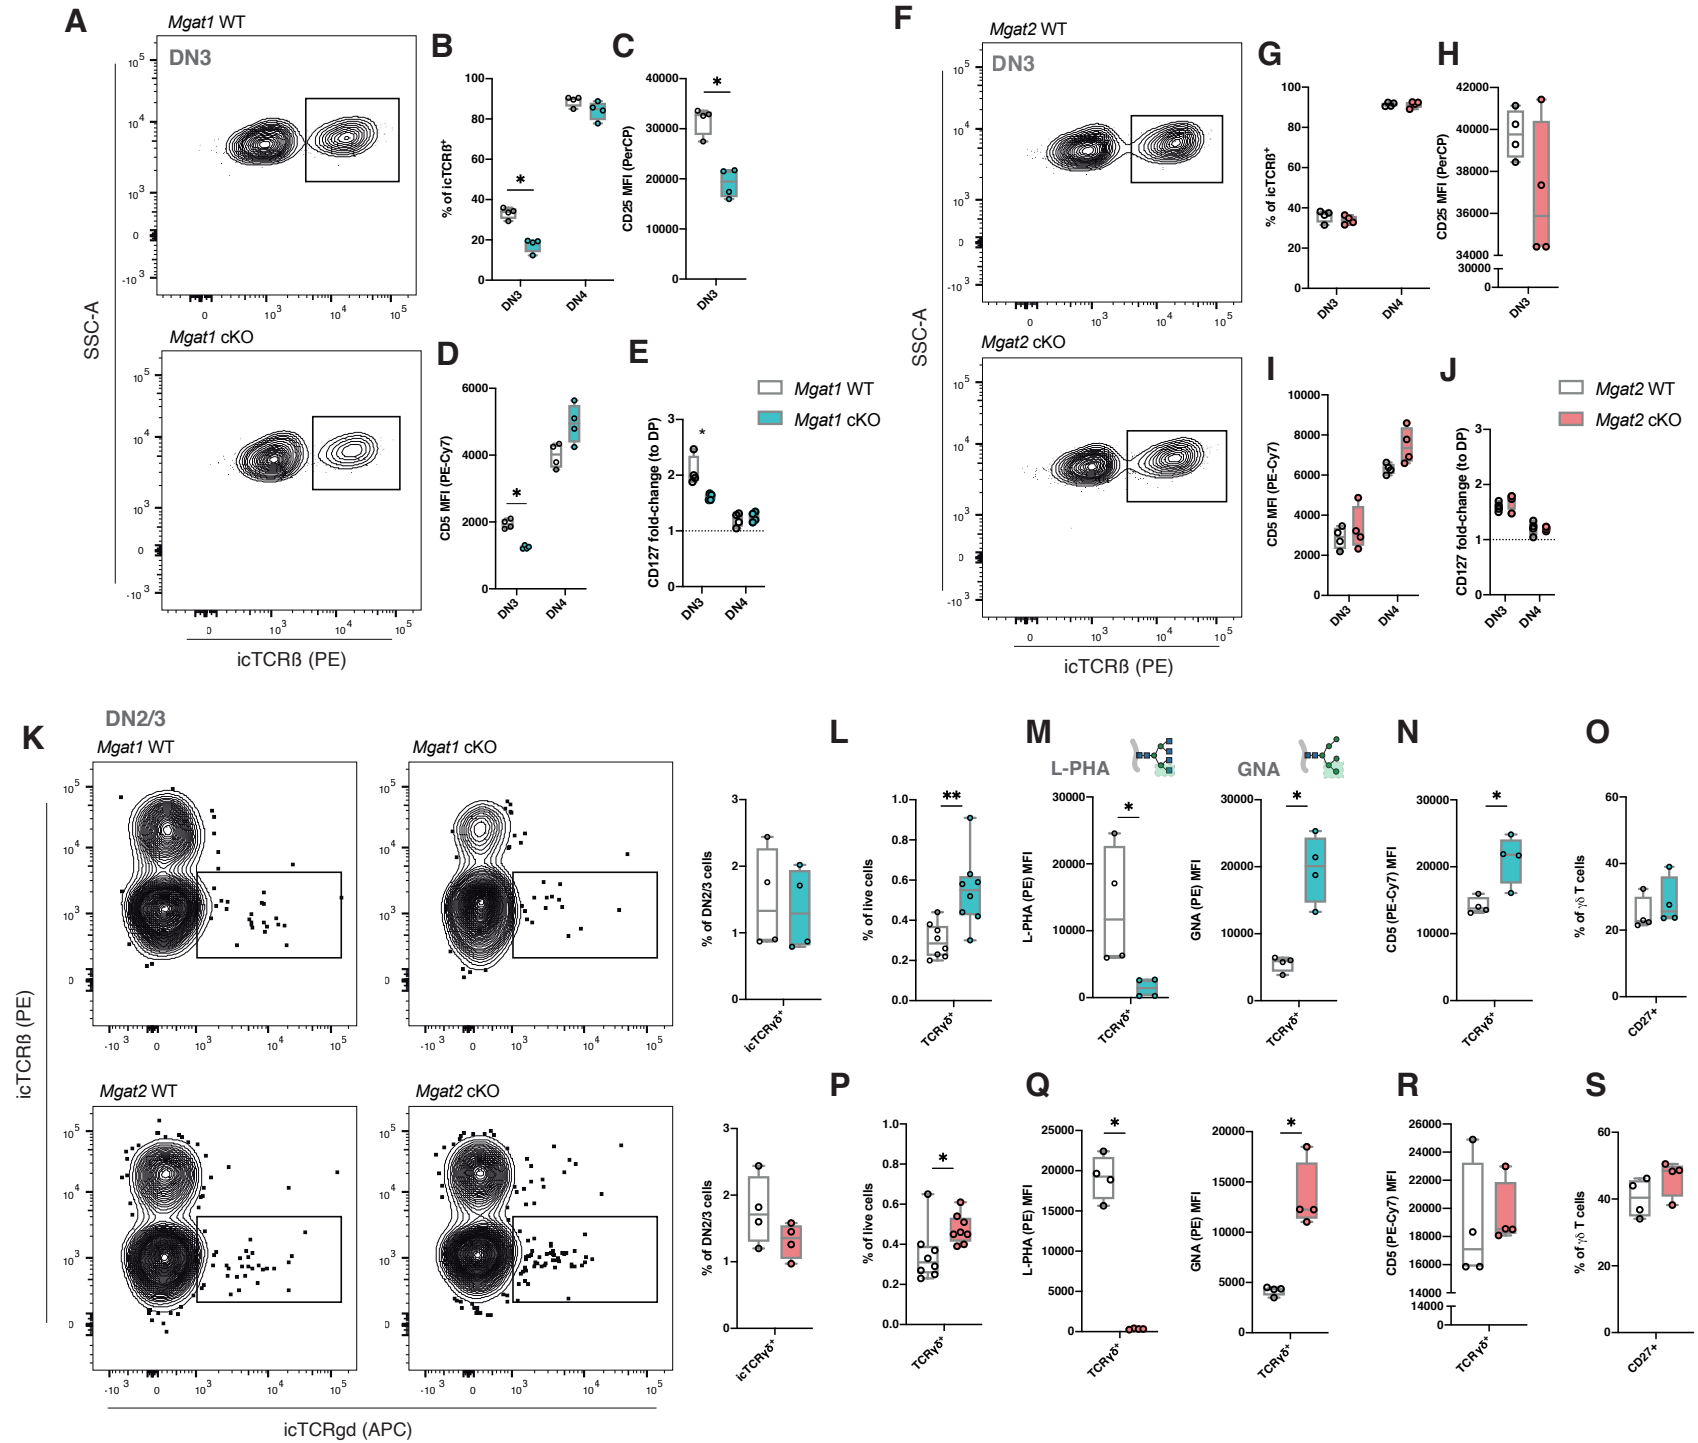



Figure 4

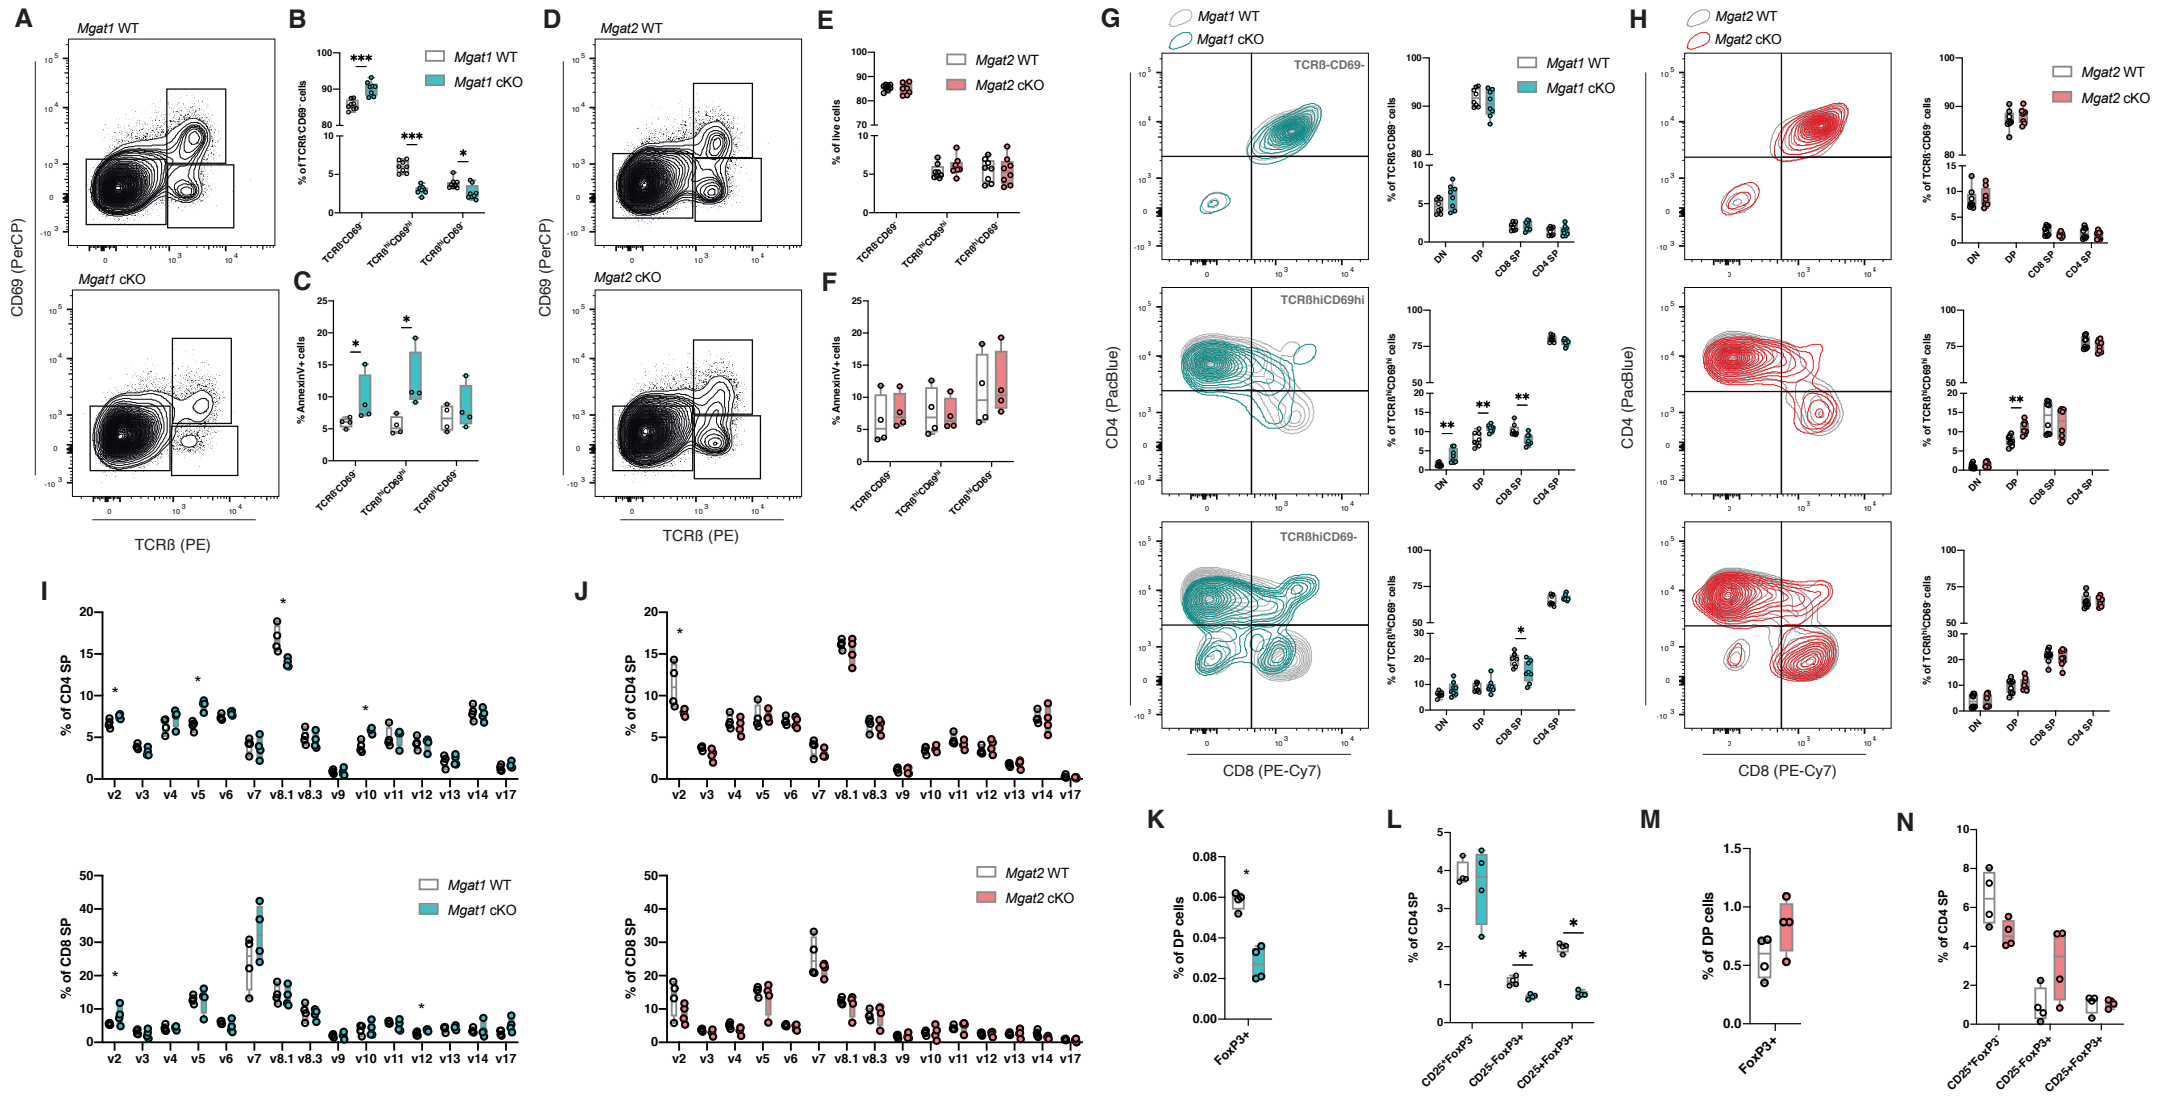

Figure 5

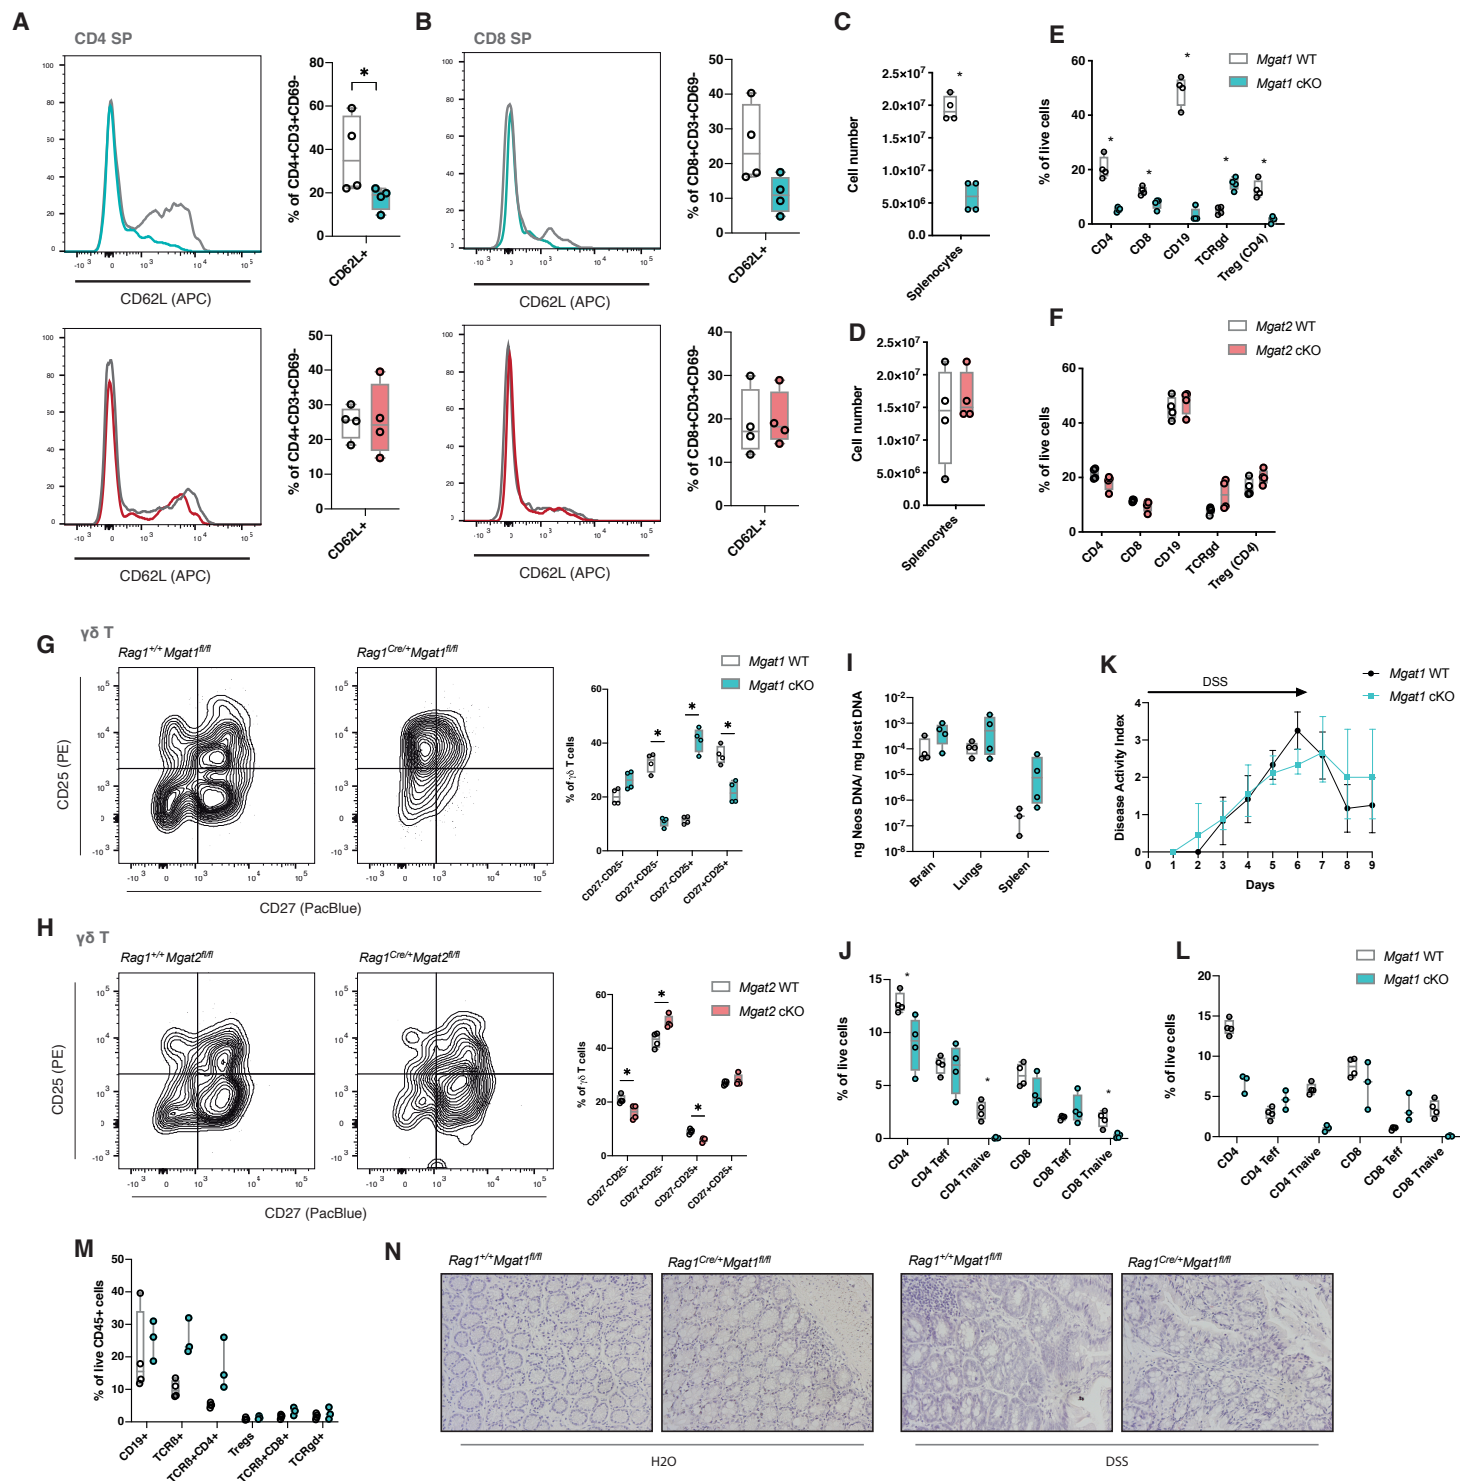

Supplemental Figure 1

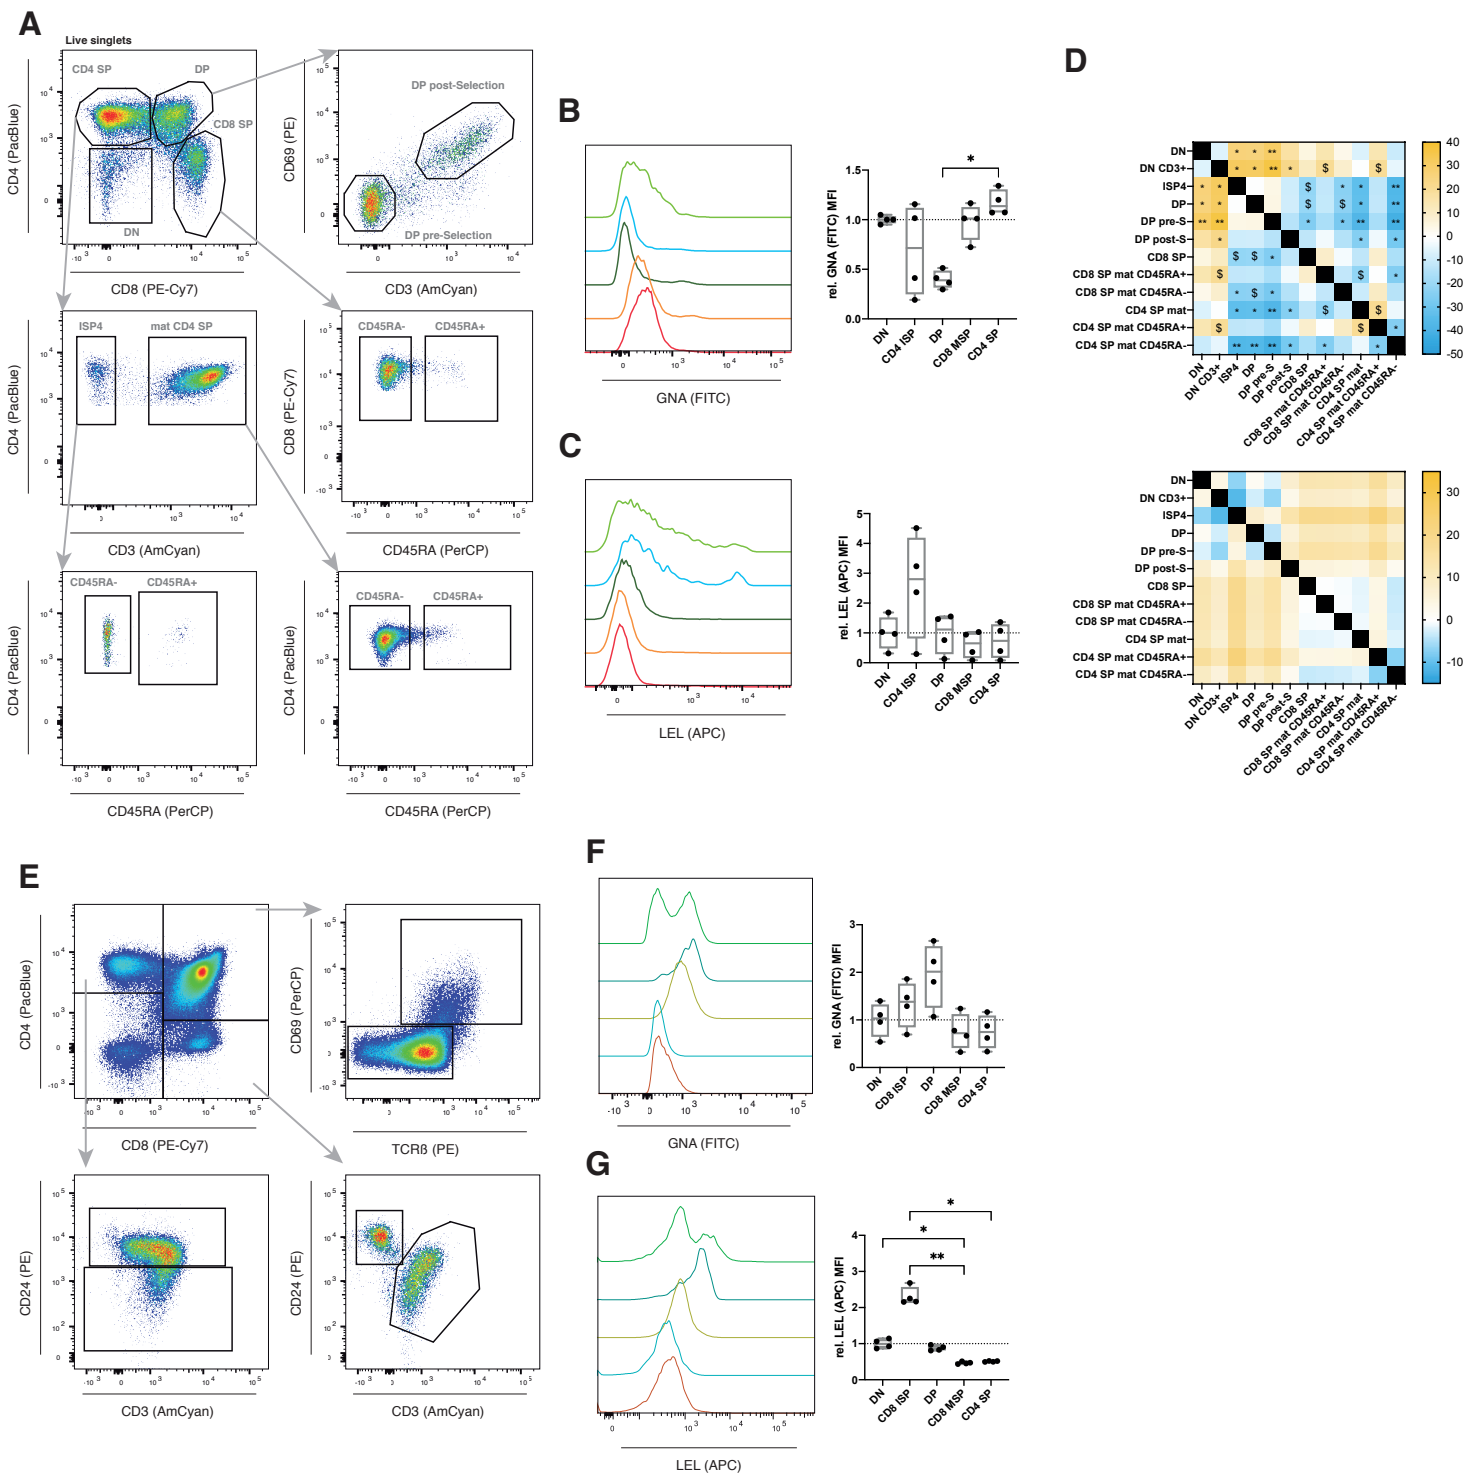

Supplemental Figure 2

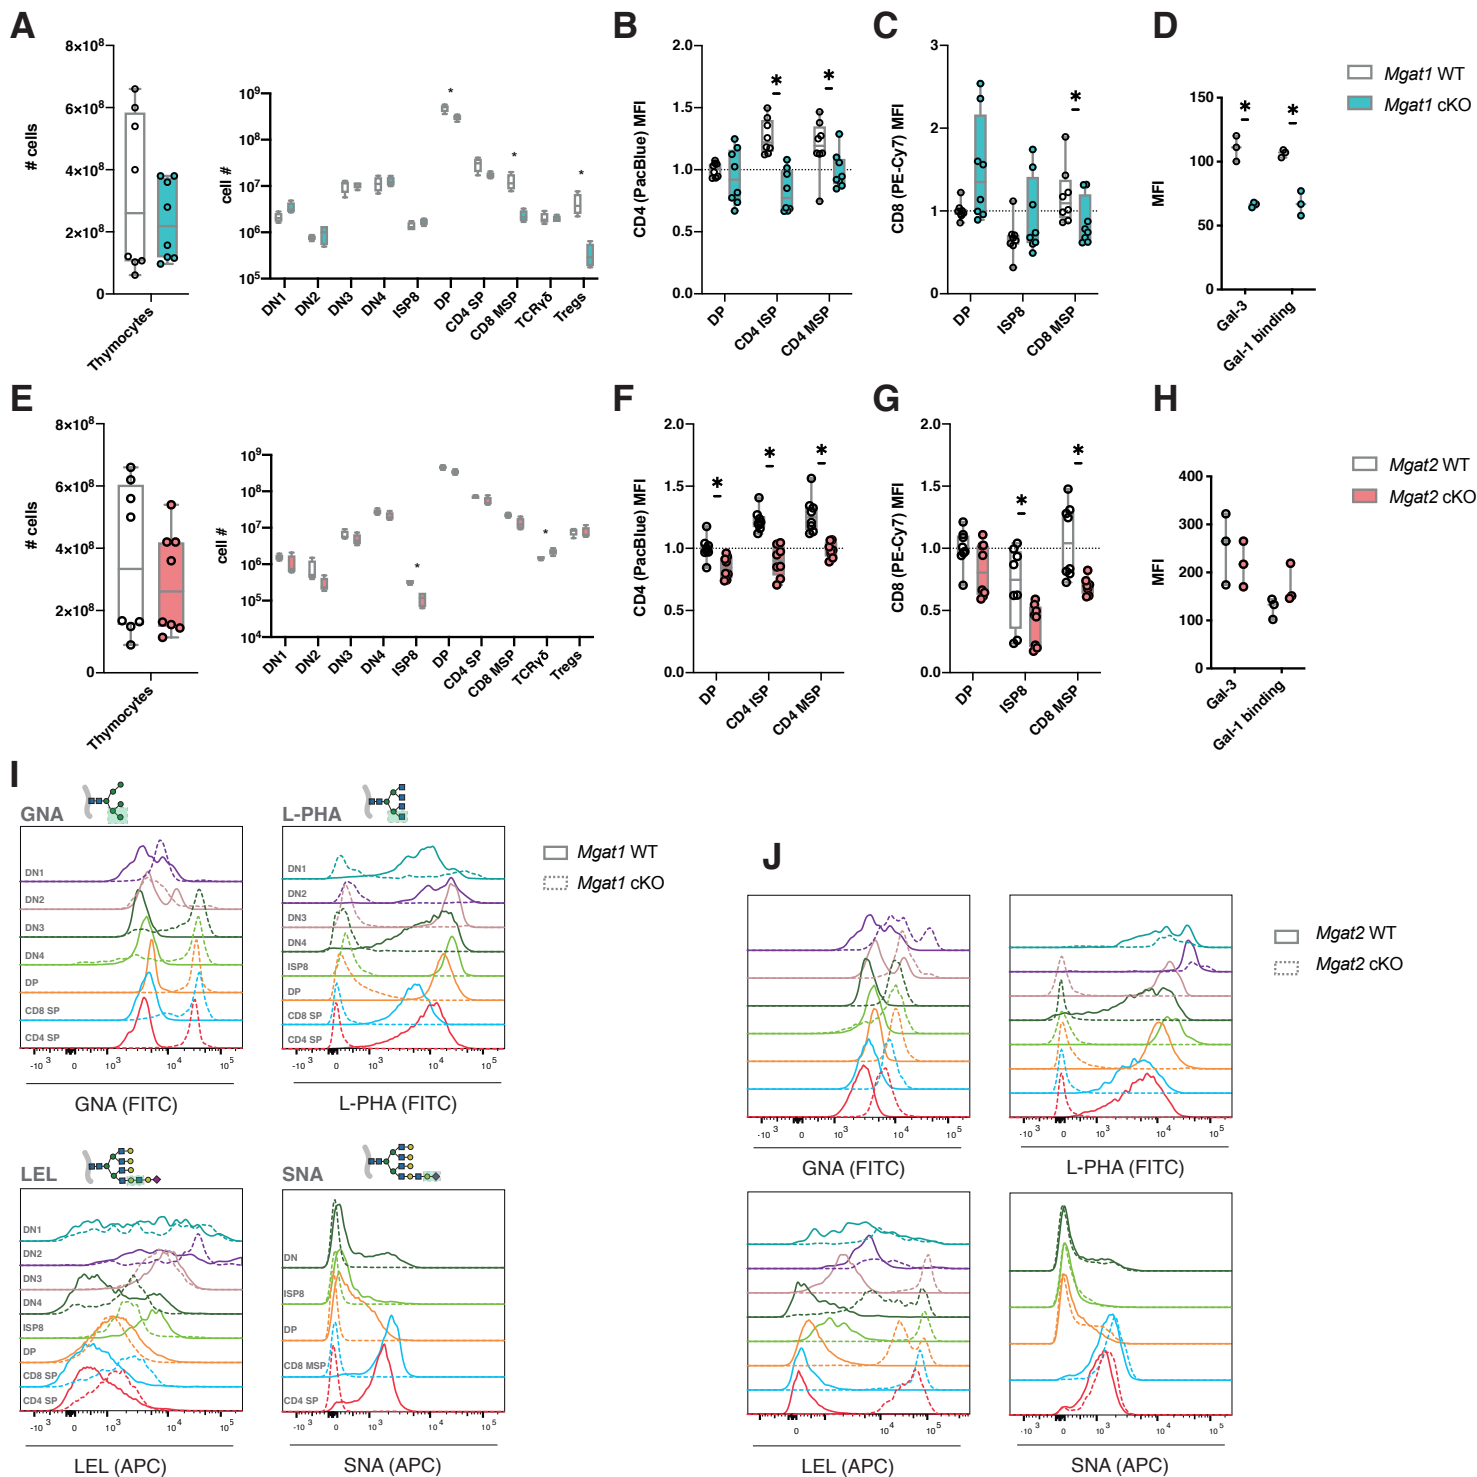

Supplemental Figure 3

**A**

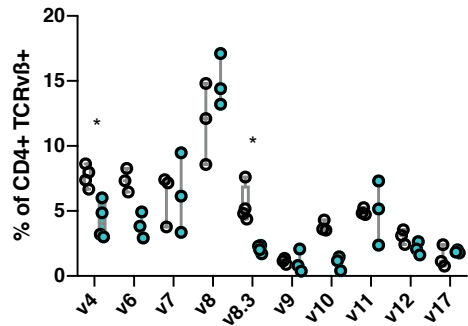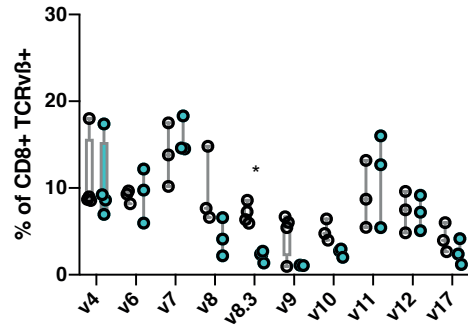

**B**

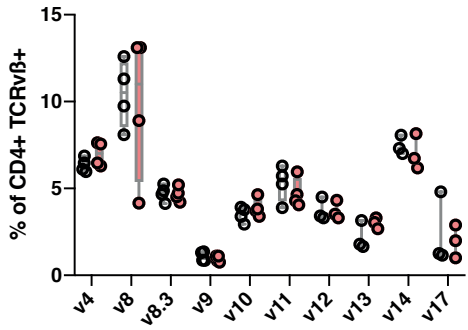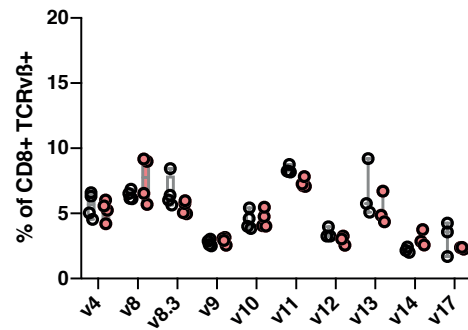

**C**

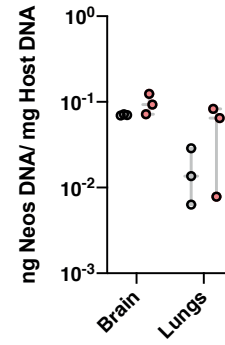

**D**

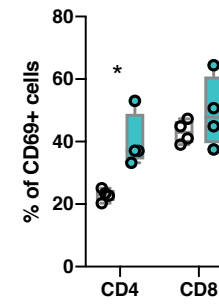

**E**

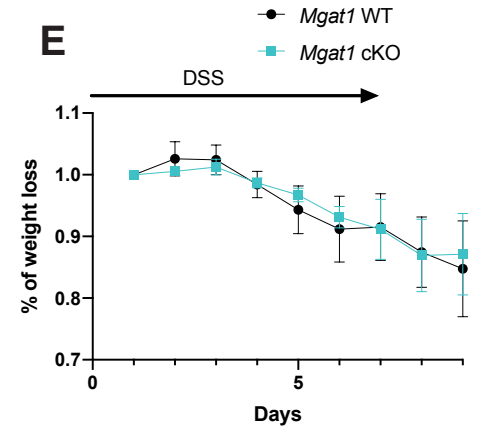

**F**

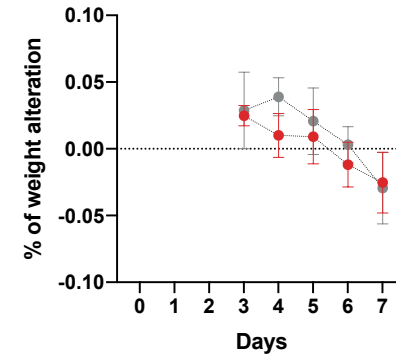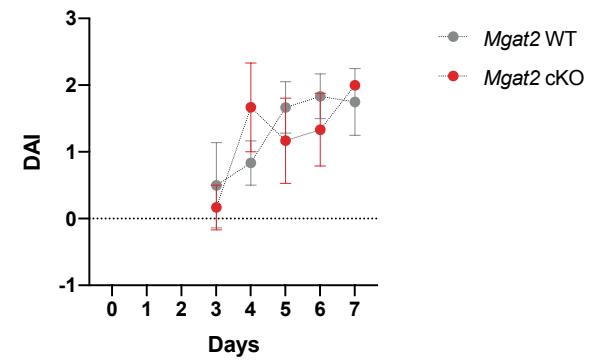

## Graphical abstract

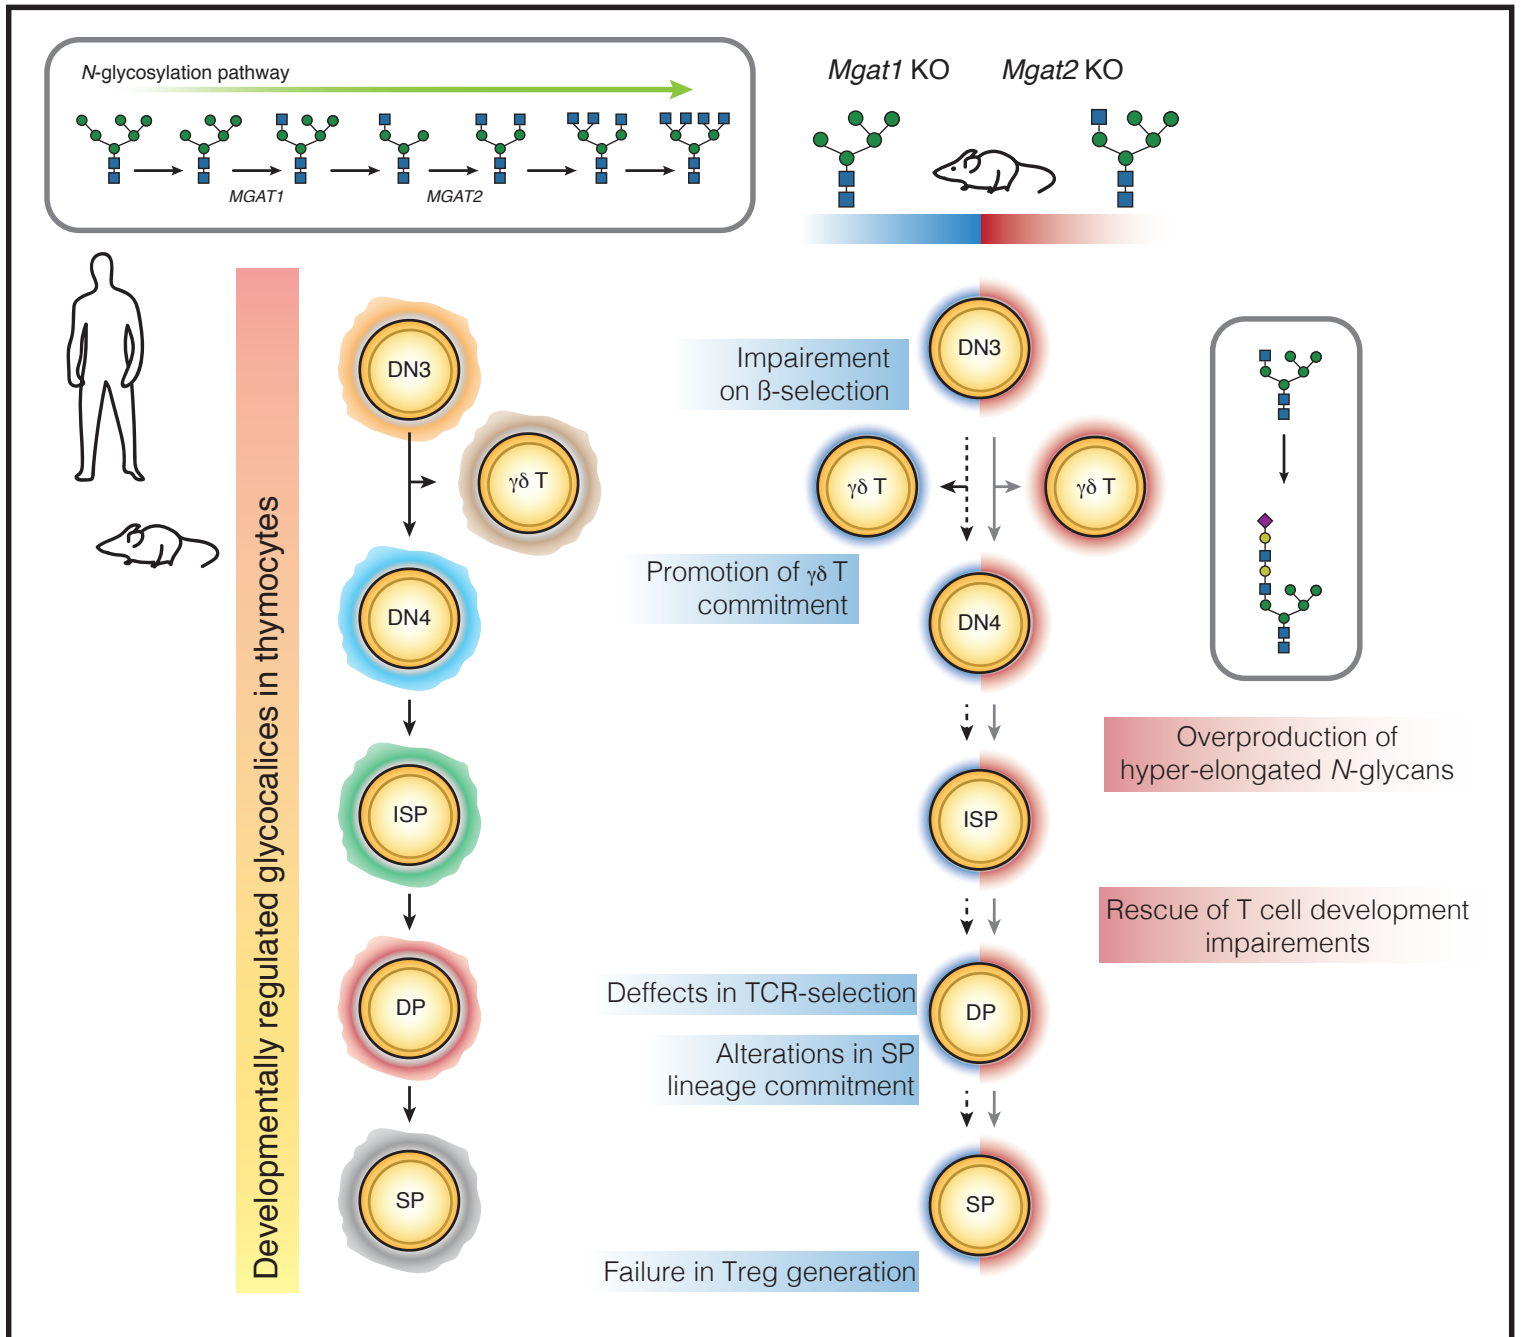

## 1 Supplementary Table 1

| REAGENT or RESOURCE                         | SOURCE       | IDENTIFIER |
|---------------------------------------------|--------------|------------|
| Antibodies                                  |              |            |
| human CD4 (RPA-T4) eFlour 450 1:100         | eBioscience  | 48-0049-41 |
| human CD8 (RPA-T8) PE-Cy7 1:400             | BD Pharmigen | 557750     |
| human CD69 (FN50) PE 1:100                  | Biolegend    | 310905     |
| human CD3 (OKT3) Brilliant Violet 510 1:100 | BD Pharmigen | 566779     |
| human CD45RA PerCP 1:100                    | eBioscience  | 45-0458-42 |
| mouse CD4 (RM4-5) eFluor 450 1:300          | eBioscience  | 48-0042-80 |
| mouse CD8alpha (53-6.7) PE-Cy7 1:500        | eBioscience  | 25-0081-81 |
| mouse CD69 (H1.2F3) PerCP-Cy5.5 1:200       | eBioscience  | 45-0691-80 |
| mouse CD3 (17A2) Brilliant Violet 510 1:300 | Biolegend    | 100233     |
| mouse CD24 (M1/69) PE 1:800                 | eBioscience  | 12-0242-81 |
| mouse TCRB (H57-597) PE 1:800               | eBioscience  | 12-5961-81 |
| mouse CD25 (PC61.5) PE-Cy5 1:400            | eBioscience  | 35-0251-80 |
| mouse CD44 (IM7) eFlour 506 1:100           | eBioscience  | 69-0441-80 |
| mouse CD5 (53-7.3) PE-Cy5 1:200             | Biolegend    | 100609     |
| mouse CD127 (A7R34)                         | eBioscience  | 11-1271-81 |
| mouse TCRgd (eBioGL3) APC 1:400             | eBioscience  | 17-5711-81 |
| mouse CD27 (LG.7F9) SuperBright 436 1:200   | eBioscience  | 62-0271-80 |
| mouse FoxP3 (FJK-16S) APC 1:200             | eBioscience  | 17-5773-80 |
| mouse CD62L (MEL-14) APC 1:200              | eBioscience  | A14720     |

|                                                             |                        |            |
|-------------------------------------------------------------|------------------------|------------|
| mouse CD25 (PC61.5) PE 1:400                                | eBioscience            | 12-0251-81 |
| mouse CD19 (eBio1D3) APC 1:500                              | eBioscience            | 17-0193-80 |
| <i>Phaseolus vulgaris</i> Leucoagglutinin FITC<br>1:1000    | Vector<br>Laboratories | FL-1111-2  |
| <i>Galanthus nivalis</i> lectin FITC                        | Vector<br>Laboratories | FL-1241-2  |
| <i>Sambucus nigra</i> lectin Cy5 1:1000                     | Vector<br>Laboratories | CL-1305-1  |
| <i>Lycopersicon esculentum</i> lectin DyLight 594<br>1:1000 | Vector<br>Laboratories | DL-1177-1  |

1  
2  
3  
4  
5  
6  
7  
8  
9  
10  
11



# 1 Supplementary Figures

Supplemental Figure 1

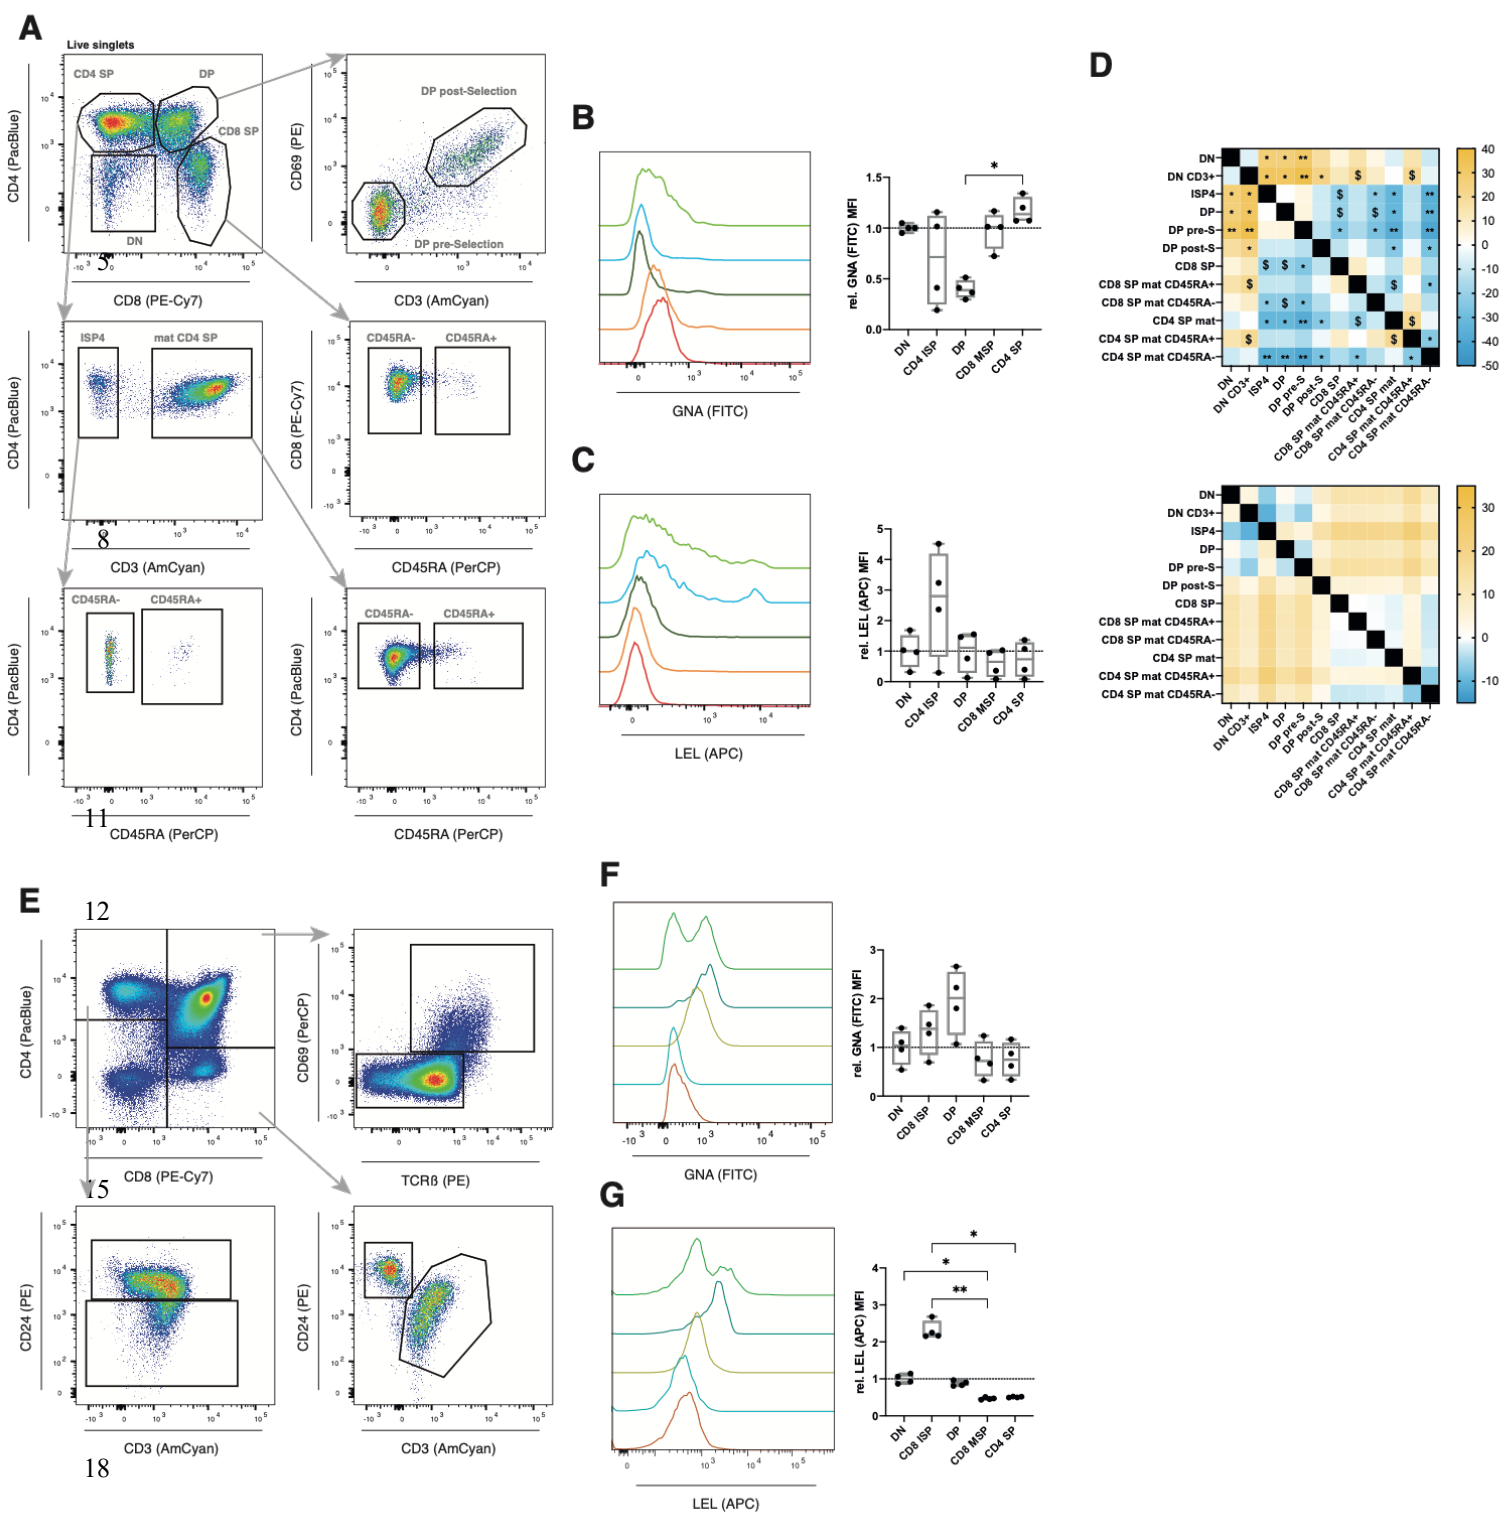

1 **Supp. Fig. 1: Glycoprofiling of human and murine thymocytes reveals**  
2 **developmentally regulated alterations.** (A) and (F) Gating strategy for human and  
3 murine thymocyte subsets analysis, respectively. (B) and (G) GNA and (C) and (H) LEL  
4 binding levels for DN, CD4 ISP or ISP8, DP, CD8 MSP and CD4 MSP, for human (N = 4)  
5 and murine (N = 4) thymocytes, respectively. (E) and (I) Thymocyte population multiple  
6 comparison heatmap results for GNA (top) and LEL (bottom) binding levels, for human  
7 (N = 4) and mice (N = 4), respectively. Colorbar indicates the mean rank difference values.  
8 Kruskal-Wallis test, q-value  $\$ < 0.1$ , \*  $< 0.05$ , \*\*  $< 0.005$  and \*\*\*  $< 0.001$ .

9

10

11

12

13

14

15

16

17

18

19

20

Supplemental Figure 2

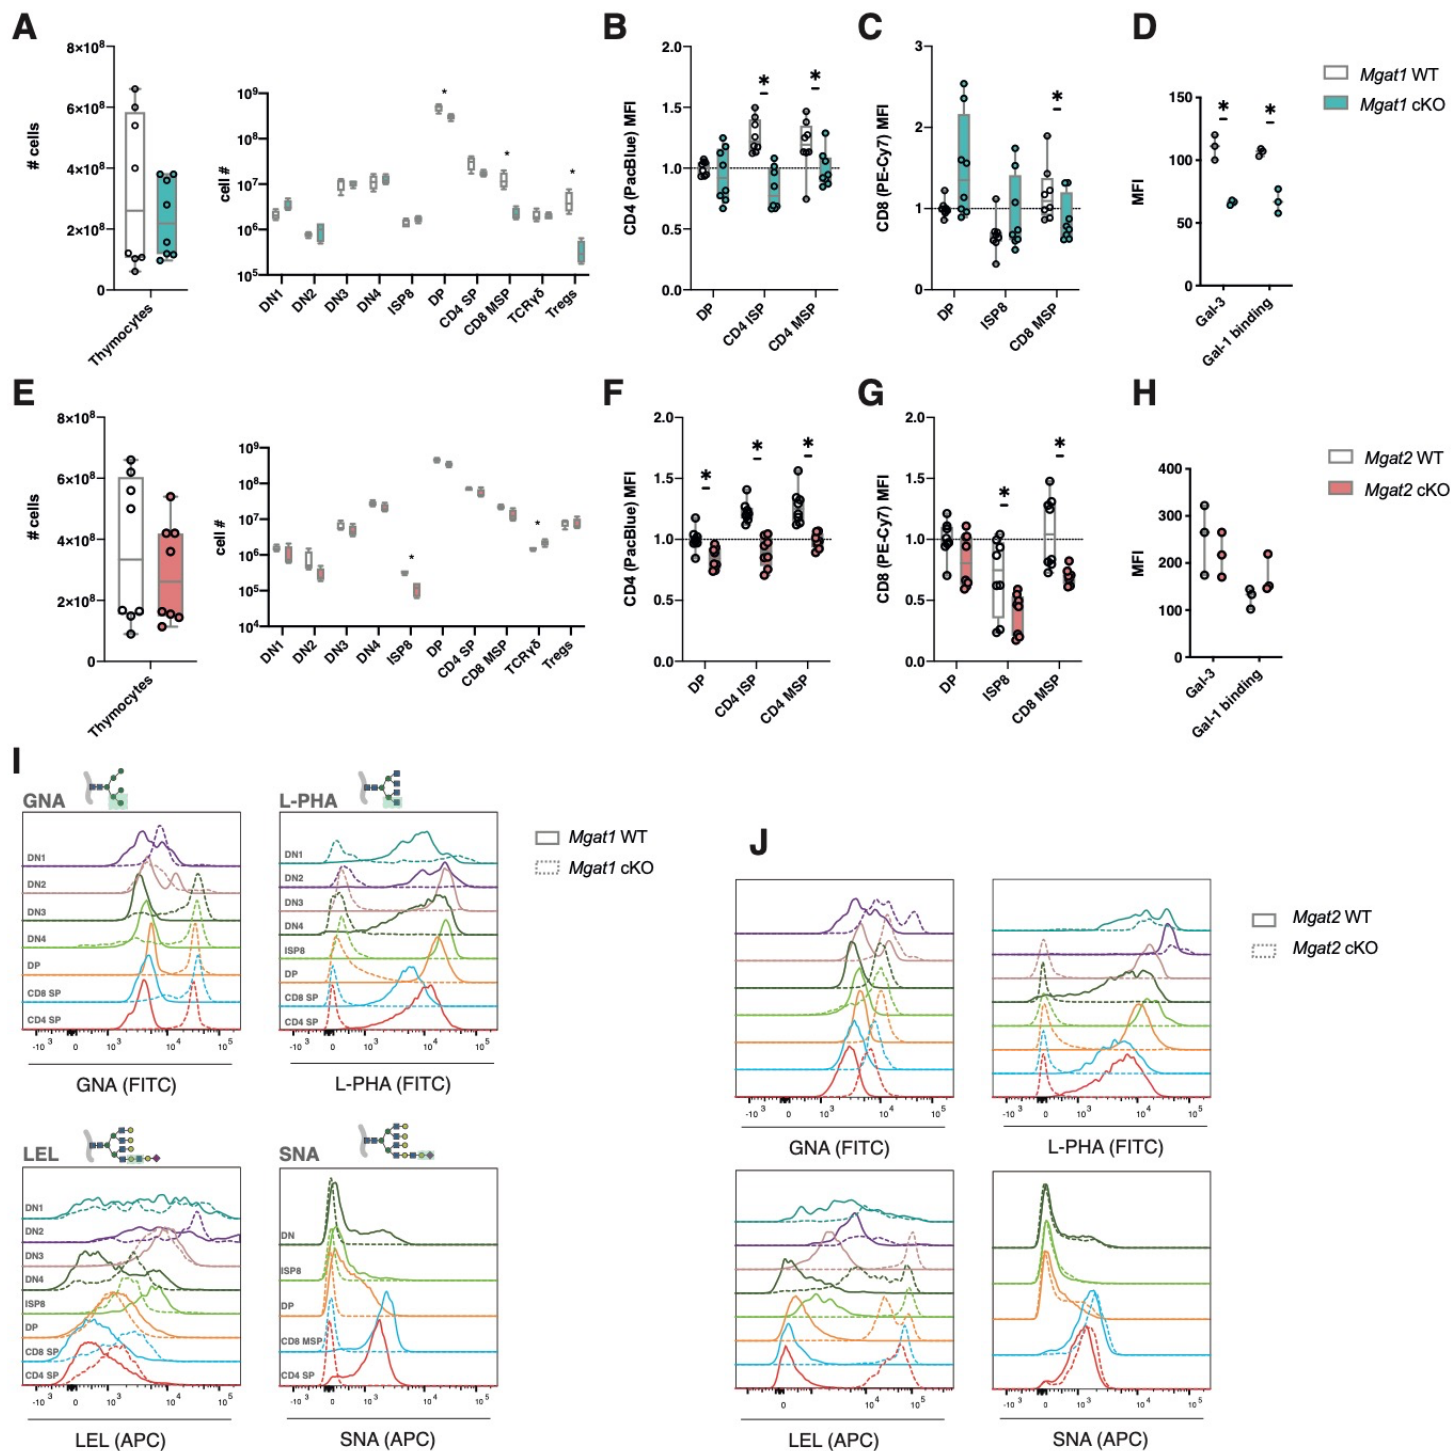

17

18

19

1 **Supp. Fig. 2: High-mannose restricted thymocytes fail to perform normal**  
2 **development.** (A) and (E) Total thymocyte numbers in *Mgat1*WT (N = 8) and *Mgat1*cKO  
3 (N = 8), and *Mgat2*WT (N = 8) and *Mgat2*cKO (N = 8) mice, respectively. (B) and (F) CD4  
4 and (C) and (G) CD8 coreceptor surface expression normalized levels (to the wildtype  
5 DP population) in *Mgat1*WT (N = 8) and *Mgat1*cKO (N = 8), and *Mgat2*WT (N = 8) and  
6 *Mgat2*cKO (N = 8) mice, respectively. (D) and (H) Endogenous Gal-3 and recombinant  
7 Gal-1 binding in DP thymocytes in *Mgat1*WT (N = 3) and *Mgat1*cKO (N = 3), and  
8 *Mgat2*WT (N = 3) and *Mgat2*cKO (N = 3) mice, respectively. (I) and (J) Representative  
9 histograms of lectin binding in in *Mgat1*WT (full lines) and *Mgat1*cKO (ticked lines), and  
10 *Mgat2*WT (full lines) and *Mgat2*cKO (ticked lines) mice, respectively.

11

12

13

14

15

16

17

18

19

20

Supplemental Figure 3

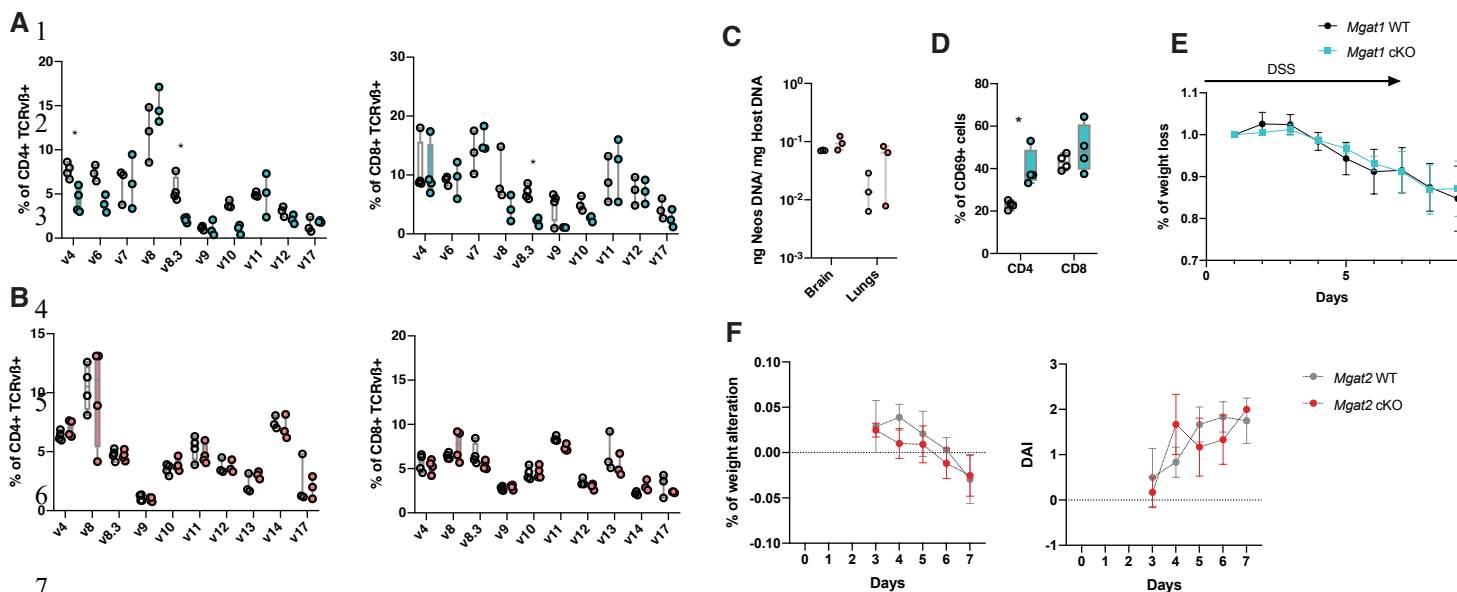

7

8

9 **Supp. Fig. 3: Absence of *Mgat1* in thymocytes impairs peripheral TCR repertoires**

10 **and T cell responses.** (A) and (B) Screen of TCR $\beta$ <sup>+</sup> expressing cells, within splenic

11 CD4 (left) and CD8 SP (right) in *Mgat1*WT (N = 4) and *Mgat1*cKO (N = 4), and *Mgat2*WT

12 (N = 4) and *Mgat2*cKO (N = 4) mice, respectively. (C) *N. caninum* organ colonization

13 determination, through the quantification of total parasite DNA in 1 mg of total host DNA,

14 in *Mgat2*WT (N = 3) and *Mgat2*cKO (N = 3). (D) Quantification of the CD69 surface levels

15 (MFI) for splenic CD4 and CD8 T cells, on the final day of infection. (E) Relative body

16 weight loss of *Mgat1*WT (N = 4) and *Mgat1*cKO (N = 3) mice, upon DSS-induced colitis.

17 (F) Relative body weight loss of *Mgat2*WT (N = 4) and *Mgat2*cKO (N = 4) mice, upon

18 DSS-induced colitis (right) and disease Activity Index (DAI) scores for the DSS-induced

19 colitis in *Mgat1*WT (N = 4) and *Mgat1*cKO (N = 3) (left).

20

21

## Graphical abstract

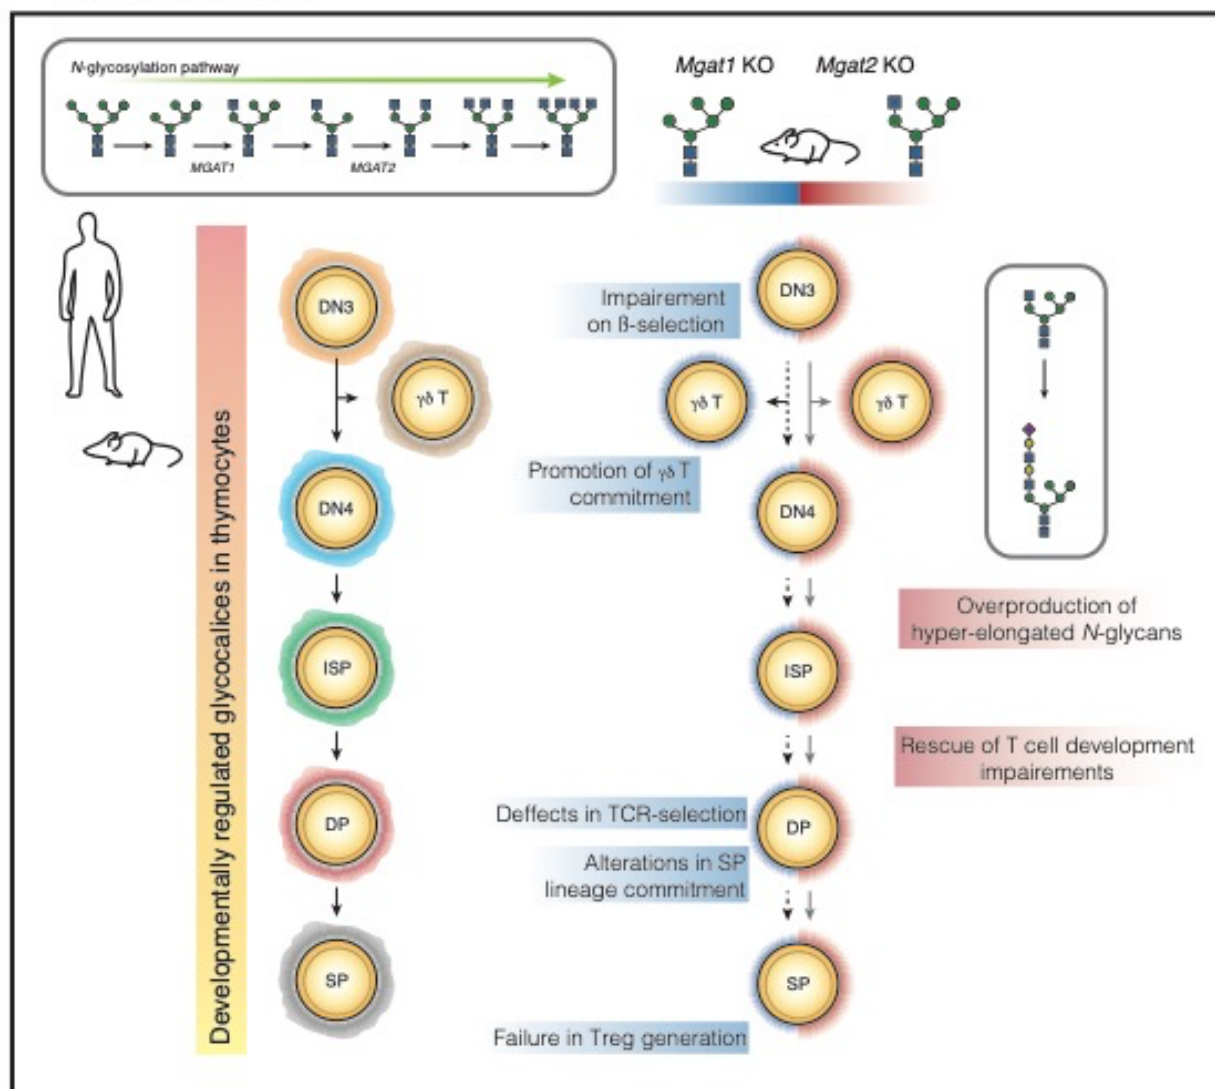

1
